# Supplementary material for: Gross motor developmental delay and associated factors among under-five children attending public health facilities of Dessie city, Ethiopia
Source: Springer Nature journal article supplement (doi:10.1186/s12887-023-04461-9), 2023-12-18
Supplement: MOESM1 [file 26542262]

|    |    |       |        |     |       |    |    |             |              |
|----|----|-------|--------|-----|-------|----|----|-------------|--------------|
| 11 | 0  | 3300  | 1. yes | 1   | 8900  | 6  | 21 | 2. married  | 4. grade 9-  |
| 39 | 0  | 3000  | 1. yes | 80  | 11000 | 6  | 20 | 2. married  | 3. grade 1-  |
| 8  | 1  | 3750  | 1. yes | 72  | 9000  | 6  | 32 | 2. married  | 5. college & |
| 48 | 2  | 3000  | 1. yes | 99  | 14400 | 6  | 35 | 2. married  | 2. oly read  |
| 56 | 2  | 3500  | 1. yes | 99  | 14900 | 6  | 29 | 2. married  | 5. college & |
| 59 | 1  | 3000  | 1. yes | 118 | 18900 | 6  | 25 | 2. married  | 4. grade 9-  |
| 31 | 0  | 3000  | 1. yes | 88  | 11300 | 6  | 30 | 2. married  | 5. college & |
| 18 | 1  | 3900  | 1. yes | 3   | 8700  | 7  | 32 | 2. married  | 3. grade 1-  |
| 25 | 3  | 4500  | 1. yes | 89  | 12500 | 6  | 34 | 2. married  | 2. oly read  |
| 53 | 0  | 3700  | 1. yes | 102 | 14400 | 6  | 30 | 2. married  | 4. grade 9-  |
| 42 | 3  | 31000 | 1. yes | 101 | 14100 | 6  | 45 | 2. married  | 2. oly read  |
| 54 | 0  | 3400  | 1. yes | 102 | 15100 | 7  | 28 | 2. married  | 5. college & |
| 34 | 0  |       | 1. yes | 89  | 11300 | 6  | 28 | 2. married  | 4. grade 9-  |
| 10 | 0  | 3500  | 1. yes | 73  | 9500  | 6  | 26 | 3. divorcec | 5. college & |
| 8  | 1  | 2100  | 1. yes | 71  | 9900  | 6  | 32 | 2. married  | 3. grade 1-  |
| 42 | 2  | 3000  | 1. yes | 98  | 12000 | 6  | 26 | 2. married  | 3. grade 1-  |
| 39 | 2  |       | 1. yes | 88  | 11000 | 8  | 33 | 4. widowec  | 3. grade 1-  |
| 31 | 2  |       | 1. yes | 91  | 12000 | 6  | 32 | 2. married  | 4. grade 9-  |
| 29 | 0  |       | 1. yes | 84  | 10500 | 6  | 25 | 2. married  | 5. college & |
| 11 | 1  |       | 1. yes | 69  | 7800  | 7  | 35 | 2. married  | 4. grade 9-  |
| 59 | 3  |       | 1. yes | 110 | 17000 | 6  | 35 |             | 3. grade 1-  |
| 36 | 0  | 2900  | 1. yes | 100 | 13100 | 6  | 25 | 2. married  | 3. grade 1-  |
| 12 | 1  | 2500  | 1. yes | 76  | 8500  | 6  | 35 | 2. married  | 5. college & |
| 17 | 1  | 3000  | 1. yes | 74  | 14000 | 6  | 28 | 2. married  | 3. grade 1-  |
| 11 | 0  |       | 1. yes | 72  | 8500  | 4  | 24 | 2. married  | 4. grade 9-  |
| 59 | 1  |       | 1. yes | 115 | 19500 | 8  | 35 | 2. married  | 2. oly read  |
| 19 | 1  | 2000  | 1. yes | 77  | 9500  | 6  | 28 | 2. married  | 3. grade 1-  |
| 59 | 3  |       | 0. no  | 102 | 14400 | 7  | 35 | 2. married  | 2. oly read  |
| 18 | 1  | 2500  | 1. yes | 81  | 10000 | 5  | 30 | 2. married  | 5. college & |
| 24 | 10 |       | 1. yes | 76  | 13500 | 6  | 23 | 2. married  | 3. grade 1-  |
| 28 | 0  | 3400  | 1. yes | 98  | 1200  | 5  | 29 | 2. married  | 5. college & |
| 14 | 0  | 3000  | 1. yes | 6   | 9100  | 6  | 28 | 2. married  | 5. college & |
| 14 | 0  | 3000  | 1. yes | 80  | 6     | 24 | 24 | 2. married  | 5. college & |
| 11 | 0  | 3500  | 1. yes | 72  | 9400  | 6  | 19 | 2. married  | 3. grade 1-  |
| 17 | 1  | 3000  | 1. yes | 79  | 8900  | 6  | 22 | 2. married  | 3. grade 1-  |
| 59 | 0  | 1800  | 1. yes | 110 | 5     | 30 | 30 | 2. married  | 3. grade 1-  |
| 48 | 3  |       | 1. yes | 98  | 14600 | 12 | 30 | 2. married  | 3. grade 1-  |
| 42 | 2  | 3000  | 1. yes | 98  | 12000 | 6  | 26 | 2. married  | 3. grade 1-  |
| 32 | 1  | 4000  | 1. yes | 95  | 14100 | 6  | 30 | 2. married  | 3. grade 1-  |
| 7  | 4  | 3000  | 1. yes | 74  | 8400  | 8  | 30 | 2. married  | 2. oly read  |
| 45 | 5  | 3000  | 1. yes | 110 | 16600 | 3  | 35 | 2. married  | 2. oly read  |
| 31 | 4  | 3000  | 1. yes | 90  | 10500 | 1  | 36 | 2. married  | 2. oly read  |
| 43 |    | 3300  | 1. yes | 100 | 14600 | 6  | 27 | 2. married  | 4. grade 9-  |
| 17 | 3  |       | 1. yes | 6   | 9400  | 7  | 30 | 2. married  | 2. oly read  |
| 13 | 1  |       | 1. yes | 71  | 9000  | 8  | 30 | 2. married  | 2. oly read  |
| 39 | 1  |       | 1. yes | 73  | 9000  | 3  | 22 | 2. married  | 2. oly read  |
| 11 | 0  | 3500  | 1. yes | 73  | 8800  | 6  | 25 | 2. married  | 5. college & |
| 50 |    | 3900  | 1. yes | 98  | 15200 | 6  | 26 | 2. married  | 5. college & |
| 59 | 0  | 2500  | 1. yes | 106 | 14200 | 6  | 28 | 2. married  | 5. college & |
| 25 | 1  | 3000  | 1. yes | 89  | 15200 | 6  | 35 | 2. married  | 5. college & |
| 53 | 1  | 3500  | 1. yes | 110 | 16.5  | 6  | 35 | 2. married  | 3. grade 1-  |
| 7  | 0  | 3500  | 1. yes | 70  | 7500  | 5  | 25 | 2. married  | 5. college & |

|    |   |       |        |     |       |    |    |             |              |
|----|---|-------|--------|-----|-------|----|----|-------------|--------------|
| 9  | 1 | 3500  | 1. yes | 67  | 7500  | 5  | 30 | 2. married  | 5. college & |
| 7  | 2 | 2800  | 1. yes | 65  | 8000  | 6  | 32 | 2. married  | 2. oly read  |
| 36 | 0 | 3000  | 1. yes | 105 | 14000 | 6  | 24 | 2. married  | 4. grade 9-  |
| 36 | 0 | 3600  | 1. yes | 104 | 15000 | 6  | 28 | 3. divorcec | 5. college & |
| 36 | 0 | 3500  | 1. yes | 100 | 12000 | 6  | 26 | 2. married  | 5. college & |
| 10 | 0 |       | 1. yes | 68  | 9000  | 6  | 22 | 3. divorcec | 2. oly read  |
| 34 | 1 | 3500  | 1. yes | 97  | 12500 | 6  | 28 | 2. married  | 5. college & |
| 59 |   | 4000  | 1. yes | 100 | 15300 | 24 | 37 | 2. married  | 3. grade 1-  |
| 10 | 0 | 1600  | 1. yes | 70  | 8000  | 6  | 25 | 2. married  | 5. college & |
| 11 | 0 | 2400  | 1. yes | 70  | 8900  | 6  | 26 | 2. married  | 3. grade 1-  |
| 29 | 0 | 3200  | 1. yes | 95  | 12000 | 6  | 31 | 2. married  | 5. college & |
| 25 | 1 | 4500  | 1. yes | 85  | 12000 | 6  | 32 | 2. married  | 2. oly read  |
| 10 | 1 | 3000  | 1. yes | 3   | 8000  | 6  | 28 | 2. married  | 4. grade 9-  |
| 30 | 6 | 3100  | 1. yes | 84  | 10900 | 6  | 35 | 2. married  | 2. oly read  |
| 20 | 2 | 3000  | 1. yes | 84  | 10500 | 9  | 23 | 2. married  | 4. grade 9-  |
| 30 |   | 3000  | 1. yes | 89  | 12100 | 6  | 23 | 2. married  | 4. grade 9-  |
| 11 | 0 | 3300  | 1. yes | 1   | 8900  | 6  | 21 | 2. married  | 4. grade 9-  |
| 48 | 2 | 3000  | 1. yes | 99  | 14400 | 6  | 35 | 2. married  | 2. oly read  |
| 56 | 2 | 3500  | 1. yes | 99  | 14900 | 6  | 29 | 2. married  | 5. college & |
| 25 | 3 | 4500  | 1. yes | 89  | 12500 | 6  | 34 | 2. married  | 2. oly read  |
| 53 | 0 | 3700  | 1. yes | 102 | 14400 | 6  | 30 | 2. married  | 4. grade 9-  |
| 42 | 3 | 31000 | 1. yes | 101 | 14100 | 6  | 45 | 2. married  | 2. oly read  |
| 54 | 0 | 3400  | 1. yes | 102 | 15100 | 7  | 28 | 2. married  | 5. college & |
| 10 | 0 | 3500  | 1. yes | 73  | 9500  | 6  | 26 | 3. divorcec | 5. college & |
| 11 | 1 |       | 1. yes | 69  | 7800  | 7  | 35 | 2. married  | 4. grade 9-  |
| 59 | 3 |       | 1. yes | 110 | 17000 | 6  | 35 |             | 3. grade 1-  |
| 17 | 1 | 3000  | 1. yes | 74  | 14000 | 6  | 28 | 2. married  | 3. grade 1-  |
| 18 | 1 | 2500  | 1. yes | 81  | 10000 | 5  | 30 | 2. married  | 5. college & |
| 28 | 0 | 3400  | 1. yes | 98  | 1200  | 5  | 29 | 2. married  | 5. college & |
| 14 | 0 | 3000  | 1. yes | 6   | 9100  | 6  | 28 | 2. married  | 5. college & |
| 11 | 0 | 3500  | 1. yes | 72  | 9400  | 6  | 19 | 2. married  | 3. grade 1-  |
| 43 |   | 3300  | 1. yes | 100 | 14600 | 6  | 27 | 2. married  | 4. grade 9-  |
| 25 | 1 | 3000  | 1. yes | 89  | 15200 | 6  | 35 | 2. married  | 5. college & |
| 59 |   | 4000  | 1. yes | 100 | 15300 | 24 | 37 | 2. married  | 3. grade 1-  |
| 10 | 1 | 3000  | 1. yes | 3   | 8000  | 6  | 28 | 2. married  | 4. grade 9-  |
| 30 | 6 | 3100  | 1. yes | 84  | 10900 | 6  | 35 | 2. married  | 2. oly read  |
| 8  | 1 | 3750  | 1. yes | 72  | 9000  | 6  | 32 | 2. married  | 5. college & |
| 56 | 2 | 3500  | 1. yes | 99  | 14900 | 6  | 29 | 2. married  | 5. college & |
| 8  | 1 | 2100  | 1. yes | 71  | 9900  | 6  | 32 | 2. married  | 3. grade 1-  |
| 39 | 2 |       | 1. yes | 88  | 11000 | 8  | 33 | 4. widowec  | 3. grade 1-  |
| 31 | 2 |       | 1. yes | 91  | 12000 | 6  | 32 | 2. married  | 4. grade 9-  |
| 29 | 0 |       | 1. yes | 84  | 10500 | 6  | 25 | 2. married  | 5. college & |
| 36 | 0 | 2900  | 1. yes | 100 | 13100 | 6  | 25 | 2. married  | 3. grade 1-  |
| 12 | 1 | 2500  | 1. yes | 76  | 8500  | 6  | 35 | 2. married  | 5. college & |
| 17 | 1 | 3000  | 1. yes | 74  | 14000 | 6  | 28 | 2. married  | 3. grade 1-  |
| 11 | 0 |       | 1. yes | 72  | 8500  | 4  | 24 | 2. married  | 4. grade 9-  |
| 14 | 0 | 3000  | 1. yes | 6   | 9100  | 6  | 28 | 2. married  | 5. college & |
| 43 |   | 3300  | 1. yes | 100 | 14600 | 6  | 27 | 2. married  | 4. grade 9-  |
| 17 | 3 |       | 1. yes | 6   | 9400  | 7  | 30 | 2. married  | 2. oly read  |
| 53 | 1 | 3500  | 1. yes | 110 | 16.5  | 6  | 35 | 2. married  | 3. grade 1-  |
| 9  | 1 | 3500  | 1. yes | 67  | 7500  | 5  | 30 | 2. married  | 5. college & |
| 29 | 0 | 3200  | 1. yes | 95  | 12000 | 6  | 31 | 2. married  | 5. college & |

|    |   |       |        |     |       |    |    |             |              |
|----|---|-------|--------|-----|-------|----|----|-------------|--------------|
| 42 | 3 | 31000 | 1. yes | 101 | 14100 | 6  | 45 | 2. married  | 2. oly read  |
| 54 | 0 | 3400  | 1. yes | 102 | 15100 | 7  | 28 | 2. married  | 5. college & |
| 10 | 1 | 3000  | 1. yes | 3   | 8000  | 6  | 28 | 2. married  | 4. grade 9-  |
| 30 | 6 | 3100  | 1. yes | 84  | 10900 | 6  | 35 | 2. married  | 2. oly read  |
| 11 | 0 | 3300  | 1. yes | 1   | 8900  | 6  | 21 | 2. married  | 4. grade 9-  |
| 39 | 0 | 3000  | 1. yes | 80  | 11000 | 6  | 20 | 2. married  | 3. grade 1-  |
| 8  | 1 | 3750  | 1. yes | 72  | 9000  | 6  | 32 | 2. married  | 5. college & |
| 48 | 2 | 3000  | 1. yes | 99  | 14400 | 6  | 35 | 2. married  | 2. oly read  |
| 56 | 2 | 3500  | 1. yes | 99  | 14900 | 6  | 29 | 2. married  | 5. college & |
| 31 | 0 | 3000  | 1. yes | 88  | 11300 | 6  | 30 | 2. married  | 5. college & |
| 25 | 3 | 4500  | 1. yes | 89  | 12500 | 6  | 34 | 2. married  | 2. oly read  |
| 53 | 0 | 3700  | 1. yes | 102 | 14400 | 6  | 30 | 2. married  | 4. grade 9-  |
| 54 | 0 | 3400  | 1. yes | 102 | 15100 | 7  | 28 | 2. married  | 5. college & |
| 10 | 0 | 3500  | 1. yes | 73  | 9500  | 6  | 26 | 3. divorcec | 5. college & |
| 8  | 1 | 2100  | 1. yes | 71  | 9900  | 6  | 32 | 2. married  | 3. grade 1-  |
| 42 | 2 | 3000  | 1. yes | 98  | 12000 | 6  | 26 | 2. married  | 3. grade 1-  |
| 39 | 2 |       | 1. yes | 88  | 11000 | 8  | 33 | 4. widowec  | 3. grade 1-  |
| 11 | 1 |       | 1. yes | 69  | 7800  | 7  | 35 | 2. married  | 4. grade 9-  |
| 17 | 1 | 3000  | 1. yes | 74  | 14000 | 6  | 28 | 2. married  | 3. grade 1-  |
| 11 | 0 |       | 1. yes | 72  | 8500  | 4  | 24 | 2. married  | 4. grade 9-  |
| 59 | 3 |       | 0. no  | 102 | 14400 | 7  | 35 | 2. married  | 2. oly read  |
| 28 | 0 | 3400  | 1. yes | 98  | 1200  | 5  | 29 | 2. married  | 5. college & |
| 14 | 0 | 3000  | 1. yes | 6   | 9100  | 6  | 28 | 2. married  | 5. college & |
| 14 | 0 | 3000  | 1. yes | 80  | 6     | 24 | 24 | 2. married  | 5. college & |
| 17 | 1 | 3000  | 1. yes | 79  | 8900  | 6  | 22 | 2. married  | 3. grade 1-  |
| 48 | 3 |       | 1. yes | 98  | 14600 | 12 | 30 | 2. married  | 3. grade 1-  |
| 32 | 1 | 4000  | 1. yes | 95  | 14100 | 6  | 30 | 2. married  | 3. grade 1-  |
| 45 | 5 | 3000  | 1. yes | 110 | 16600 | 3  | 35 | 2. married  | 2. oly read  |
| 31 | 4 | 3000  | 1. yes | 90  | 10500 | 1  | 36 | 2. married  | 2. oly read  |
| 43 |   | 3300  | 1. yes | 100 | 14600 | 6  | 27 | 2. married  | 4. grade 9-  |
| 17 | 3 |       | 1. yes | 6   | 9400  | 7  | 30 | 2. married  | 2. oly read  |
| 39 | 1 |       | 1. yes | 73  | 9000  | 3  | 22 | 2. married  | 2. oly read  |
| 50 |   | 3900  | 1. yes | 98  | 15200 | 6  | 26 | 2. married  | 5. college & |
| 7  | 0 | 3500  | 1. yes | 70  | 7500  | 5  | 25 | 2. married  | 5. college & |
| 9  | 1 | 3500  | 1. yes | 67  | 7500  | 5  | 30 | 2. married  | 5. college & |
| 36 | 0 | 3600  | 1. yes | 104 | 15000 | 6  | 28 | 3. divorcec | 5. college & |
| 34 | 1 | 3500  | 1. yes | 97  | 12500 | 6  | 28 | 2. married  | 5. college & |
| 11 | 0 | 2400  | 1. yes | 70  | 8900  | 6  | 26 | 2. married  | 3. grade 1-  |
| 25 | 1 | 4500  | 1. yes | 85  | 12000 | 6  | 32 | 2. married  | 2. oly read  |
| 30 | 6 | 3100  | 1. yes | 84  | 10900 | 6  | 35 | 2. married  | 2. oly read  |
| 20 | 2 | 3000  | 1. yes | 84  | 10500 | 9  | 23 | 2. married  | 4. grade 9-  |
| 30 |   | 3000  | 1. yes | 89  | 12100 | 6  | 23 | 2. married  | 4. grade 9-  |
| 25 | 3 | 4500  | 1. yes | 89  | 12500 | 6  | 34 | 2. married  | 2. oly read  |
| 53 | 0 | 3700  | 1. yes | 102 | 14400 | 6  | 30 | 2. married  | 4. grade 9-  |
| 42 | 3 | 31000 | 1. yes | 101 | 14100 | 6  | 45 | 2. married  | 2. oly read  |
| 54 | 0 | 3400  | 1. yes | 102 | 15100 | 7  | 28 | 2. married  | 5. college & |
| 59 | 3 |       | 1. yes | 110 | 17000 | 6  | 35 |             | 3. grade 1-  |
| 11 | 0 | 3500  | 1. yes | 72  | 9400  | 6  | 19 | 2. married  | 3. grade 1-  |
| 10 | 1 | 3000  | 1. yes | 3   | 8000  | 6  | 28 | 2. married  | 4. grade 9-  |
| 30 | 6 | 3100  | 1. yes | 84  | 10900 | 6  | 35 | 2. married  | 2. oly read  |
| 8  | 1 | 3750  | 1. yes | 72  | 9000  | 6  | 32 | 2. married  | 5. college & |
| 8  | 1 | 2100  | 1. yes | 71  | 9900  | 6  | 32 | 2. married  | 3. grade 1-  |

|    |   |       |        |     |       |    |                             |
|----|---|-------|--------|-----|-------|----|-----------------------------|
| 39 | 2 |       | 1. yes | 88  | 11000 | 8  | 33 4. widowec 3. grade 1-   |
| 31 | 2 |       | 1. yes | 91  | 12000 | 6  | 32 2. married 4. grade 9-   |
| 56 | 2 | 3500  | 1. yes | 99  | 14900 | 6  | 29 2. married 5. college &  |
| 31 | 0 | 3000  | 1. yes | 88  | 11300 | 6  | 30 2. married 5. college &  |
| 25 | 3 | 4500  | 1. yes | 89  | 12500 | 6  | 34 2. married 2. oly read   |
| 34 | 0 |       | 1. yes | 89  | 11300 | 6  | 28 2. married 4. grade 9-   |
| 10 | 0 | 3500  | 1. yes | 73  | 9500  | 6  | 26 3. divorcec 5. college & |
| 11 | 1 |       | 1. yes | 69  | 7800  | 7  | 35 2. married 4. grade 9-   |
| 36 | 0 | 2900  | 1. yes | 100 | 13100 | 6  | 25 2. married 3. grade 1-   |
| 59 | 1 |       | 1. yes | 115 | 19500 | 8  | 35 2. married 2. oly read   |
| 59 | 0 | 1800  | 1. yes | 110 | 5     | 30 | 30 2. married 3. grade 1-   |
| 43 |   | 3300  | 1. yes | 100 | 14600 | 6  | 27 2. married 4. grade 9-   |
| 17 | 3 |       | 1. yes | 6   | 9400  | 7  | 30 2. married 2. oly read   |
| 13 | 1 |       | 1. yes | 71  | 9000  | 8  | 30 2. married 2. oly read   |
| 11 | 0 | 3500  | 1. yes | 73  | 8800  | 6  | 25 2. married 5. college &  |
| 25 | 1 | 3000  | 1. yes | 89  | 15200 | 6  | 35 2. married 5. college &  |
| 53 | 1 | 3500  | 1. yes | 110 | 16.5  | 6  | 35 2. married 3. grade 1-   |
| 9  | 1 | 3500  | 1. yes | 67  | 7500  | 5  | 30 2. married 5. college &  |
| 36 | 0 | 3000  | 1. yes | 105 | 14000 | 6  | 24 2. married 4. grade 9-   |
| 36 | 0 | 3500  | 1. yes | 100 | 12000 | 6  | 26 2. married 5. college &  |
| 10 | 0 |       | 1. yes | 68  | 9000  | 6  | 22 3. divorcec 2. oly read  |
| 34 | 1 | 3500  | 1. yes | 97  | 12500 | 6  | 28 2. married 5. college &  |
| 25 | 1 | 4500  | 1. yes | 85  | 12000 | 6  | 32 2. married 2. oly read   |
| 30 | 6 | 3100  | 1. yes | 84  | 10900 | 6  | 35 2. married 2. oly read   |
| 11 | 0 | 3300  | 1. yes | 1   | 8900  | 6  | 21 2. married 4. grade 9-   |
| 48 | 2 | 3000  | 1. yes | 99  | 14400 | 6  | 35 2. married 2. oly read   |
| 25 | 3 | 4500  | 1. yes | 89  | 12500 | 6  | 34 2. married 2. oly read   |
| 17 | 1 | 3000  | 1. yes | 74  | 14000 | 6  | 28 2. married 3. grade 1-   |
| 28 | 0 | 3400  | 1. yes | 98  | 1200  | 5  | 29 2. married 5. college &  |
| 11 | 0 | 3500  | 1. yes | 72  | 9400  | 6  | 19 2. married 3. grade 1-   |
| 43 |   | 3300  | 1. yes | 100 | 14600 | 6  | 27 2. married 4. grade 9-   |
| 10 | 1 | 3000  | 1. yes | 3   | 8000  | 6  | 28 2. married 4. grade 9-   |
| 30 | 6 | 3100  | 1. yes | 84  | 10900 | 6  | 35 2. married 2. oly read   |
| 56 | 2 | 3500  | 1. yes | 99  | 14900 | 6  | 29 2. married 5. college &  |
| 14 | 0 | 3000  | 1. yes | 6   | 9100  | 6  | 28 2. married 5. college &  |
| 42 | 3 | 31000 | 1. yes | 101 | 14100 | 6  | 45 2. married 2. oly read   |
| 8  | 1 | 3750  | 1. yes | 72  | 9000  | 6  | 32 2. married 5. college &  |
| 56 | 2 | 3500  | 1. yes | 99  | 14900 | 6  | 29 2. married 5. college &  |
| 25 | 3 | 4500  | 1. yes | 89  | 12500 | 6  | 34 2. married 2. oly read   |
| 42 | 2 | 3000  | 1. yes | 98  | 12000 | 6  | 26 2. married 3. grade 1-   |
| 28 | 0 | 3400  | 1. yes | 98  | 1200  | 5  | 29 2. married 5. college &  |
| 14 | 0 | 3000  | 1. yes | 80  | 6     | 24 | 24 2. married 5. college &  |
| 32 | 1 | 4000  | 1. yes | 95  | 14100 | 6  | 30 2. married 3. grade 1-   |
| 43 |   | 3300  | 1. yes | 100 | 14600 | 6  | 27 2. married 4. grade 9-   |
| 17 | 3 |       | 1. yes | 6   | 9400  | 7  | 30 2. married 2. oly read   |
| 7  | 0 | 3500  | 1. yes | 70  | 7500  | 5  | 25 2. married 5. college &  |
| 36 | 0 | 3600  | 1. yes | 104 | 15000 | 6  | 28 3. divorcec 5. college & |
| 34 | 1 | 3500  | 1. yes | 97  | 12500 | 6  | 28 2. married 5. college &  |
| 11 | 0 | 2400  | 1. yes | 70  | 8900  | 6  | 26 2. married 3. grade 1-   |
| 30 |   | 3000  | 1. yes | 89  | 12100 | 6  | 23 2. married 4. grade 9-   |
| 42 | 3 | 31000 | 1. yes | 101 | 14100 | 6  | 45 2. married 2. oly read   |
| 54 | 0 | 3400  | 1. yes | 102 | 15100 | 7  | 28 2. married 5. college &  |

|    |   |       |        |     |       |    |                             |
|----|---|-------|--------|-----|-------|----|-----------------------------|
| 56 | 2 | 3500  | 1. yes | 99  | 14900 | 6  | 29 2. married 5. college &  |
| 10 | 0 | 3500  | 1. yes | 73  | 9500  | 6  | 26 3. divorcec 5. college & |
| 42 | 2 | 3000  | 1. yes | 98  | 12000 | 6  | 26 2. married 3. grade 1-   |
| 11 | 0 |       | 1. yes | 72  | 8500  | 4  | 24 2. married 4. grade 9-   |
| 59 | 3 |       | 0. no  | 102 | 14400 | 7  | 35 2. married 2. oly read   |
| 11 | 0 | 3500  | 1. yes | 72  | 9400  | 6  | 19 2. married 3. grade 1-   |
| 32 | 1 | 4000  | 1. yes | 95  | 14100 | 6  | 30 2. married 3. grade 1-   |
| 50 |   | 3900  | 1. yes | 98  | 15200 | 6  | 26 2. married 5. college &  |
| 25 | 1 | 3000  | 1. yes | 89  | 15200 | 6  | 35 2. married 5. college &  |
| 7  | 0 | 3500  | 1. yes | 70  | 7500  | 5  | 25 2. married 5. college &  |
| 36 | 0 | 3600  | 1. yes | 104 | 15000 | 6  | 28 3. divorcec 5. college & |
| 10 | 1 | 3000  | 1. yes | 3   | 8000  | 6  | 28 2. married 4. grade 9-   |
| 56 | 2 | 3500  | 1. yes | 99  | 14900 | 6  | 29 2. married 5. college &  |
| 53 | 0 | 3700  | 1. yes | 102 | 14400 | 6  | 30 2. married 4. grade 9-   |
| 42 | 3 | 31000 | 1. yes | 101 | 14100 | 6  | 45 2. married 2. oly read   |
| 54 | 0 | 3400  | 1. yes | 102 | 15100 | 7  | 28 2. married 5. college &  |
| 10 | 0 | 3500  | 1. yes | 73  | 9500  | 6  | 26 3. divorcec 5. college & |
| 17 | 1 | 3000  | 1. yes | 74  | 14000 | 6  | 28 2. married 3. grade 1-   |
| 43 |   | 3300  | 1. yes | 100 | 14600 | 6  | 27 2. married 4. grade 9-   |
| 25 | 1 | 3000  | 1. yes | 89  | 15200 | 6  | 35 2. married 5. college &  |
| 59 |   | 4000  | 1. yes | 100 | 15300 | 24 | 37 2. married 3. grade 1-   |
| 31 | 2 |       | 1. yes | 91  | 12000 | 6  | 32 2. married 4. grade 9-   |
| 11 | 0 |       | 1. yes | 72  | 8500  | 4  | 24 2. married 4. grade 9-   |
| 17 | 3 |       | 1. yes | 6   | 9400  | 7  | 30 2. married 2. oly read   |
| 42 | 3 | 31000 | 1. yes | 101 | 14100 | 6  | 45 2. married 2. oly read   |
| 10 | 1 | 3000  | 1. yes | 3   | 8000  | 6  | 28 2. married 4. grade 9-   |
| 39 | 0 | 3000  | 1. yes | 80  | 11000 | 6  | 20 2. married 3. grade 1-   |
| 42 | 2 | 3000  | 1. yes | 98  | 12000 | 6  | 26 2. married 3. grade 1-   |
| 28 | 0 | 3400  | 1. yes | 98  | 1200  | 5  | 29 2. married 5. college &  |
| 14 | 0 | 3000  | 1. yes | 80  | 6     | 24 | 24 2. married 5. college &  |
| 48 | 3 |       | 1. yes | 98  | 14600 | 12 | 30 2. married 3. grade 1-   |
| 45 | 5 | 3000  | 1. yes | 110 | 16600 | 3  | 35 2. married 2. oly read   |
| 43 |   | 3300  | 1. yes | 100 | 14600 | 6  | 27 2. married 4. grade 9-   |
| 17 | 3 |       | 1. yes | 6   | 9400  | 7  | 30 2. married 2. oly read   |
| 50 |   | 3900  | 1. yes | 98  | 15200 | 6  | 26 2. married 5. college &  |
| 30 | 6 | 3100  | 1. yes | 84  | 10900 | 6  | 35 2. married 2. oly read   |
| 8  | 1 | 3750  | 1. yes | 72  | 9000  | 6  | 32 2. married 5. college &  |
| 8  | 1 | 2100  | 1. yes | 71  | 9900  | 6  | 32 2. married 3. grade 1-   |
| 25 | 3 | 4500  | 1. yes | 89  | 12500 | 6  | 34 2. married 2. oly read   |
| 34 | 0 |       | 1. yes | 89  | 11300 | 6  | 28 2. married 4. grade 9-   |
| 10 | 0 | 3500  | 1. yes | 73  | 9500  | 6  | 26 3. divorcec 5. college & |
| 11 | 1 |       | 1. yes | 69  | 7800  | 7  | 35 2. married 4. grade 9-   |
| 59 | 1 |       | 1. yes | 115 | 19500 | 8  | 35 2. married 2. oly read   |
| 43 |   | 3300  | 1. yes | 100 | 14600 | 6  | 27 2. married 4. grade 9-   |
| 36 | 0 | 3000  | 1. yes | 105 | 14000 | 6  | 24 2. married 4. grade 9-   |
| 36 | 0 | 3500  | 1. yes | 100 | 12000 | 6  | 26 2. married 5. college &  |
| 10 | 0 |       | 1. yes | 68  | 9000  | 6  | 22 3. divorcec 2. oly read  |
| 25 | 1 | 4500  | 1. yes | 85  | 12000 | 6  | 32 2. married 2. oly read   |
| 56 | 2 | 3500  | 1. yes | 99  | 14900 | 6  | 29 2. married 5. college &  |
| 32 | 1 | 4000  | 1. yes | 95  | 14100 | 6  | 30 2. married 3. grade 1-   |
| 53 | 0 | 3700  | 1. yes | 102 | 14400 | 6  | 30 2. married 4. grade 9-   |
| 42 | 2 | 3000  | 1. yes | 98  | 12000 | 6  | 26 2. married 3. grade 1-   |

|    |   |              |     |       |    |                             |
|----|---|--------------|-----|-------|----|-----------------------------|
| 39 | 2 | 1. yes       | 88  | 11000 | 8  | 33 4. widowed 3. grade 1-   |
| 36 | 0 | 2900 1. yes  | 100 | 13100 | 6  | 25 2. married 3. grade 1-   |
| 59 | 0 | 1800 1. yes  | 110 | 5     | 30 | 30 2. married 3. grade 1-   |
| 7  | 2 | 2800 1. yes  | 65  | 8000  | 6  | 32 2. married 2. oly read   |
| 30 | 6 | 3100 1. yes  | 84  | 10900 | 6  | 35 2. married 2. oly read   |
| 48 | 2 | 3000 1. yes  | 99  | 14400 | 6  | 35 2. married 2. oly read   |
| 25 | 3 | 4500 1. yes  | 89  | 12500 | 6  | 34 2. married 2. oly read   |
| 28 | 0 | 3400 1. yes  | 98  | 1200  | 5  | 29 2. married 5. college &  |
| 59 |   | 4000 1. yes  | 100 | 15300 | 24 | 37 2. married 3. grade 1-   |
| 30 | 6 | 3100 1. yes  | 84  | 10900 | 6  | 35 2. married 2. oly read   |
| 14 | 0 | 3000 1. yes  | 6   | 9100  | 6  | 28 2. married 5. college &  |
| 53 | 1 | 3500 1. yes  | 110 | 16.5  | 6  | 35 2. married 3. grade 1-   |
| 42 | 3 | 31000 1. yes | 101 | 14100 | 6  | 45 2. married 2. oly read   |
| 10 | 1 | 3000 1. yes  | 3   | 8000  | 6  | 28 2. married 4. grade 9-   |
| 8  | 1 | 3750 1. yes  | 72  | 9000  | 6  | 32 2. married 5. college &  |
| 8  | 1 | 2100 1. yes  | 71  | 9900  | 6  | 32 2. married 3. grade 1-   |
| 42 | 2 | 3000 1. yes  | 98  | 12000 | 6  | 26 2. married 3. grade 1-   |
| 11 | 1 | 1. yes       | 69  | 7800  | 7  | 35 2. married 4. grade 9-   |
| 59 | 3 | 0. no        | 102 | 14400 | 7  | 35 2. married 2. oly read   |
| 43 |   | 3300 1. yes  | 100 | 14600 | 6  | 27 2. married 4. grade 9-   |
| 25 | 1 | 4500 1. yes  | 85  | 12000 | 6  | 32 2. married 2. oly read   |
| 59 | 3 | 1. yes       | 110 | 17000 | 6  | 35 3. grade 1-              |
| 10 | 0 | 3500 1. yes  | 73  | 9500  | 6  | 26 3. divorcec 5. college & |
| 36 | 0 | 2900 1. yes  | 100 | 13100 | 6  | 25 2. married 3. grade 1-   |
| 59 | 0 | 1800 1. yes  | 110 | 5     | 30 | 30 2. married 3. grade 1-   |
| 43 |   | 3300 1. yes  | 100 | 14600 | 6  | 27 2. married 4. grade 9-   |
| 9  | 1 | 3500 1. yes  | 67  | 7500  | 5  | 30 2. married 5. college &  |
| 25 | 1 | 4500 1. yes  | 85  | 12000 | 6  | 32 2. married 2. oly read   |
| 30 | 6 | 3100 1. yes  | 84  | 10900 | 6  | 35 2. married 2. oly read   |
| 48 | 2 | 3000 1. yes  | 99  | 14400 | 6  | 35 2. married 2. oly read   |
| 17 | 1 | 3000 1. yes  | 74  | 14000 | 6  | 28 2. married 3. grade 1-   |
| 11 | 0 | 3500 1. yes  | 72  | 9400  | 6  | 19 2. married 3. grade 1-   |
| 43 |   | 3300 1. yes  | 100 | 14600 | 6  | 27 2. married 4. grade 9-   |
| 25 | 3 | 4500 1. yes  | 89  | 12500 | 6  | 34 2. married 2. oly read   |
| 14 | 0 | 3000 1. yes  | 80  | 6     | 24 | 24 2. married 5. college &  |
| 17 | 3 | 1. yes       | 6   | 9400  | 7  | 30 2. married 2. oly read   |
| 34 | 1 | 3500 1. yes  | 97  | 12500 | 6  | 28 2. married 5. college &  |
| 25 | 1 | 3000 1. yes  | 89  | 15200 | 6  | 35 2. married 5. college &  |
| 10 | 1 | 3000 1. yes  | 3   | 8000  | 6  | 28 2. married 4. grade 9-   |
| 56 | 2 | 3500 1. yes  | 99  | 14900 | 6  | 29 2. married 5. college &  |
| 10 | 0 | 3500 1. yes  | 73  | 9500  | 6  | 26 3. divorcec 5. college & |
| 17 | 1 | 3000 1. yes  | 74  | 14000 | 6  | 28 2. married 3. grade 1-   |
| 43 |   | 3300 1. yes  | 100 | 14600 | 6  | 27 2. married 4. grade 9-   |
| 25 | 1 | 3000 1. yes  | 89  | 15200 | 6  | 35 2. married 5. college &  |
| 59 |   | 4000 1. yes  | 100 | 15300 | 24 | 37 2. married 3. grade 1-   |
| 14 | 0 | 3000 1. yes  | 80  | 6     | 24 | 24 2. married 5. college &  |
| 10 | 0 | 3500 1. yes  | 73  | 9500  | 6  | 26 3. divorcec 5. college & |
| 11 | 1 | 1. yes       | 69  | 7800  | 7  | 35 2. married 4. grade 9-   |
| 11 | 0 | 3300 1. yes  | 1   | 8900  | 6  | 21 2. married 4. grade 9-   |
| 48 | 2 | 3000 1. yes  | 99  | 14400 | 6  | 35 2. married 2. oly read   |
| 56 | 2 | 3500 1. yes  | 99  | 14900 | 6  | 29 2. married 5. college &  |
| 54 | 0 | 3400 1. yes  | 102 | 15100 | 7  | 28 2. married 5. college &  |

|    |   |       |        |     |       |    |    |             |              |
|----|---|-------|--------|-----|-------|----|----|-------------|--------------|
| 10 | 0 | 3500  | 1. yes | 73  | 9500  | 6  | 26 | 3. divorcec | 5. college & |
| 8  | 1 | 2100  | 1. yes | 71  | 9900  | 6  | 32 | 2. married  | 3. grade 1-  |
| 31 | 2 |       | 1. yes | 91  | 12000 | 6  | 32 | 2. married  | 4. grade 9-  |
| 11 | 1 |       | 1. yes | 69  | 7800  | 7  | 35 | 2. married  | 4. grade 9-  |
| 59 | 3 |       | 1. yes | 110 | 17000 | 6  | 35 |             | 3. grade 1-  |
| 36 | 0 | 2900  | 1. yes | 100 | 13100 | 6  | 25 | 2. married  | 3. grade 1-  |
| 17 | 1 | 3000  | 1. yes | 74  | 14000 | 6  | 28 | 2. married  | 3. grade 1-  |
| 59 | 3 |       | 0. no  | 102 | 14400 | 7  | 35 | 2. married  | 2. oly read  |
| 18 | 1 | 2500  | 1. yes | 81  | 10000 | 5  | 30 | 2. married  | 5. college & |
| 14 | 0 | 3000  | 1. yes | 6   | 9100  | 6  | 28 | 2. married  | 5. college & |
| 45 | 5 | 3000  | 1. yes | 110 | 16600 | 3  | 35 | 2. married  | 2. oly read  |
| 17 | 3 |       | 1. yes | 6   | 9400  | 7  | 30 | 2. married  | 2. oly read  |
| 39 | 1 |       | 1. yes | 73  | 9000  | 3  | 22 | 2. married  | 2. oly read  |
| 11 | 0 | 3500  | 1. yes | 73  | 8800  | 6  | 25 | 2. married  | 5. college & |
| 36 | 0 | 3000  | 1. yes | 105 | 14000 | 6  | 24 | 2. married  | 4. grade 9-  |
| 36 | 0 | 3600  | 1. yes | 104 | 15000 | 6  | 28 | 3. divorcec | 5. college & |
| 10 | 0 |       | 1. yes | 68  | 9000  | 6  | 22 | 3. divorcec | 2. oly read  |
| 34 | 1 | 3500  | 1. yes | 97  | 12500 | 6  | 28 | 2. married  | 5. college & |
| 59 |   | 4000  | 1. yes | 100 | 15300 | 24 | 37 | 2. married  | 3. grade 1-  |
| 29 | 0 | 3200  | 1. yes | 95  | 12000 | 6  | 31 | 2. married  | 5. college & |
| 20 | 2 | 3000  | 1. yes | 84  | 10500 | 9  | 23 | 2. married  | 4. grade 9-  |
| 48 | 2 | 3000  | 1. yes | 99  | 14400 | 6  | 35 | 2. married  | 2. oly read  |
| 25 | 3 | 4500  | 1. yes | 89  | 12500 | 6  | 34 | 2. married  | 2. oly read  |
| 53 | 0 | 3700  | 1. yes | 102 | 14400 | 6  | 30 | 2. married  | 4. grade 9-  |
| 11 | 1 |       | 1. yes | 69  | 7800  | 7  | 35 | 2. married  | 4. grade 9-  |
| 59 | 3 |       | 1. yes | 110 | 17000 | 6  | 35 |             | 3. grade 1-  |
| 17 | 1 | 3000  | 1. yes | 74  | 14000 | 6  | 28 | 2. married  | 3. grade 1-  |
| 25 | 1 | 3000  | 1. yes | 89  | 15200 | 6  | 35 | 2. married  | 5. college & |
| 59 |   | 4000  | 1. yes | 100 | 15300 | 24 | 37 | 2. married  | 3. grade 1-  |
| 30 | 6 | 3100  | 1. yes | 84  | 10900 | 6  | 35 | 2. married  | 2. oly read  |
| 8  | 1 | 3750  | 1. yes | 72  | 9000  | 6  | 32 | 2. married  | 5. college & |
| 31 | 2 |       | 1. yes | 91  | 12000 | 6  | 32 | 2. married  | 4. grade 9-  |
| 29 | 0 |       | 1. yes | 84  | 10500 | 6  | 25 | 2. married  | 5. college & |
| 36 | 0 | 2900  | 1. yes | 100 | 13100 | 6  | 25 | 2. married  | 3. grade 1-  |
| 17 | 3 |       | 1. yes | 6   | 9400  | 7  | 30 | 2. married  | 2. oly read  |
| 9  | 1 | 3500  | 1. yes | 67  | 7500  | 5  | 30 | 2. married  | 5. college & |
| 42 | 3 | 31000 | 1. yes | 101 | 14100 | 6  | 45 | 2. married  | 2. oly read  |
| 10 | 1 | 3000  | 1. yes | 3   | 8000  | 6  | 28 | 2. married  | 4. grade 9-  |
| 39 | 0 | 3000  | 1. yes | 80  | 11000 | 6  | 20 | 2. married  | 3. grade 1-  |
| 8  | 1 | 3750  | 1. yes | 72  | 9000  | 6  | 32 | 2. married  | 5. college & |
| 48 | 2 | 3000  | 1. yes | 99  | 14400 | 6  | 35 | 2. married  | 2. oly read  |
| 56 | 2 | 3500  | 1. yes | 99  | 14900 | 6  | 29 | 2. married  | 5. college & |
| 31 | 0 | 3000  | 1. yes | 88  | 11300 | 6  | 30 | 2. married  | 5. college & |
| 53 | 0 | 3700  | 1. yes | 102 | 14400 | 6  | 30 | 2. married  | 4. grade 9-  |
| 54 | 0 | 3400  | 1. yes | 102 | 15100 | 7  | 28 | 2. married  | 5. college & |
| 8  | 1 | 2100  | 1. yes | 71  | 9900  | 6  | 32 | 2. married  | 3. grade 1-  |
| 11 | 1 |       | 1. yes | 69  | 7800  | 7  | 35 | 2. married  | 4. grade 9-  |
| 45 | 5 | 3000  | 1. yes | 110 | 16600 | 3  | 35 | 2. married  | 2. oly read  |
| 39 | 1 |       | 1. yes | 73  | 9000  | 3  | 22 | 2. married  | 2. oly read  |
| 50 |   | 3900  | 1. yes | 98  | 15200 | 6  | 26 | 2. married  | 5. college & |
| 9  | 1 | 3500  | 1. yes | 67  | 7500  | 5  | 30 | 2. married  | 5. college & |
| 36 | 0 | 3600  | 1. yes | 104 | 15000 | 6  | 28 | 3. divorcec | 5. college & |

|    |   |       |        |     |       |    |    |             |              |
|----|---|-------|--------|-----|-------|----|----|-------------|--------------|
| 25 | 1 | 4500  | 1. yes | 85  | 12000 | 6  | 32 | 2. married  | 2. oly read  |
| 30 | 6 | 3100  | 1. yes | 84  | 10900 | 6  | 35 | 2. married  | 2. oly read  |
| 53 | 0 | 3700  | 1. yes | 102 | 14400 | 6  | 30 | 2. married  | 4. grade 9-  |
| 42 | 3 | 31000 | 1. yes | 101 | 14100 | 6  | 45 | 2. married  | 2. oly read  |
| 39 | 2 |       | 1. yes | 88  | 11000 | 8  | 33 | 4. widowec  | 3. grade 1-  |
| 31 | 2 |       | 1. yes | 91  | 12000 | 6  | 32 | 2. married  | 4. grade 9-  |
| 31 | 0 | 3000  | 1. yes | 88  | 11300 | 6  | 30 | 2. married  | 5. college & |
| 25 | 3 | 4500  | 1. yes | 89  | 12500 | 6  | 34 | 2. married  | 2. oly read  |
| 10 | 0 | 3500  | 1. yes | 73  | 9500  | 6  | 26 | 3. divorcec | 5. college & |
| 59 | 0 | 1800  | 1. yes | 110 | 5     | 30 | 30 | 2. married  | 3. grade 1-  |
| 17 | 3 |       | 1. yes | 6   | 9400  | 7  | 30 | 2. married  | 2. oly read  |
| 36 | 0 | 3000  | 1. yes | 105 | 14000 | 6  | 24 | 2. married  | 4. grade 9-  |
| 25 | 1 | 4500  | 1. yes | 85  | 12000 | 6  | 32 | 2. married  | 2. oly read  |
| 30 | 6 | 3100  | 1. yes | 84  | 10900 | 6  | 35 | 2. married  | 2. oly read  |
| 28 | 0 | 3400  | 1. yes | 98  | 1200  | 5  | 29 | 2. married  | 5. college & |
| 43 |   | 3300  | 1. yes | 100 | 14600 | 6  | 27 | 2. married  | 4. grade 9-  |
| 56 | 2 | 3500  | 1. yes | 99  | 14900 | 6  | 29 | 2. married  | 5. college & |
| 42 | 3 | 31000 | 1. yes | 101 | 14100 | 6  | 45 | 2. married  | 2. oly read  |
| 8  | 1 | 3750  | 1. yes | 72  | 9000  | 6  | 32 | 2. married  | 5. college & |
| 25 | 3 | 4500  | 1. yes | 89  | 12500 | 6  | 34 | 2. married  | 2. oly read  |
| 43 |   | 3300  | 1. yes | 100 | 14600 | 6  | 27 | 2. married  | 4. grade 9-  |
| 30 |   | 3000  | 1. yes | 89  | 12100 | 6  | 23 | 2. married  | 4. grade 9-  |
| 56 | 2 | 3500  | 1. yes | 99  | 14900 | 6  | 29 | 2. married  | 5. college & |
| 32 | 1 | 4000  | 1. yes | 95  | 14100 | 6  | 30 | 2. married  | 3. grade 1-  |
| 25 | 1 | 3000  | 1. yes | 89  | 15200 | 6  | 35 | 2. married  | 5. college & |
| 42 | 3 | 31000 | 1. yes | 101 | 14100 | 6  | 45 | 2. married  | 2. oly read  |
| 14 | 0 | 3000  | 1. yes | 80  | 6     | 24 | 24 | 2. married  | 5. college & |
| 8  | 1 | 3750  | 1. yes | 72  | 9000  | 6  | 32 | 2. married  | 5. college & |
| 11 | 1 |       | 1. yes | 69  | 7800  | 7  | 35 | 2. married  | 4. grade 9-  |
| 36 | 0 | 3000  | 1. yes | 105 | 14000 | 6  | 24 | 2. married  | 4. grade 9-  |
| 25 | 1 | 4500  | 1. yes | 85  | 12000 | 6  | 32 | 2. married  | 2. oly read  |
| 32 | 1 | 4000  | 1. yes | 95  | 14100 | 6  | 30 | 2. married  | 3. grade 1-  |
| 53 | 0 | 3700  | 1. yes | 102 | 14400 | 6  | 30 | 2. married  | 4. grade 9-  |
| 42 | 2 | 3000  | 1. yes | 98  | 12000 | 6  | 26 | 2. married  | 3. grade 1-  |
| 39 | 2 |       | 1. yes | 88  | 11000 | 8  | 33 | 4. widowec  | 3. grade 1-  |
| 28 | 0 | 3400  | 1. yes | 98  | 1200  | 5  | 29 | 2. married  | 5. college & |
| 8  | 1 | 3750  | 1. yes | 72  | 9000  | 6  | 32 | 2. married  | 5. college & |
| 8  | 1 | 2100  | 1. yes | 71  | 9900  | 6  | 32 | 2. married  | 3. grade 1-  |
| 43 |   | 3300  | 1. yes | 100 | 14600 | 6  | 27 | 2. married  | 4. grade 9-  |
| 59 | 0 | 1800  | 1. yes | 110 | 5     | 30 | 30 | 2. married  | 3. grade 1-  |
| 43 |   | 3300  | 1. yes | 100 | 14600 | 6  | 27 | 2. married  | 4. grade 9-  |
| 43 |   | 3300  | 1. yes | 100 | 14600 | 6  | 27 | 2. married  | 4. grade 9-  |
| 25 | 3 | 4500  | 1. yes | 89  | 12500 | 6  | 34 | 2. married  | 2. oly read  |
| 34 | 1 | 3500  | 1. yes | 97  | 12500 | 6  | 28 | 2. married  | 5. college & |
| 10 | 1 | 3000  | 1. yes | 3   | 8000  | 6  | 28 | 2. married  | 4. grade 9-  |
| 43 |   | 3300  | 1. yes | 100 | 14600 | 6  | 27 | 2. married  | 4. grade 9-  |
| 59 |   | 4000  | 1. yes | 100 | 15300 | 24 | 37 | 2. married  | 3. grade 1-  |
| 10 | 0 | 3500  | 1. yes | 73  | 9500  | 6  | 26 | 3. divorcec | 5. college & |
| 11 | 0 | 3300  | 1. yes | 1   | 8900  | 6  | 21 | 2. married  | 4. grade 9-  |
| 30 | 6 | 3100  | 1. yes | 84  | 10900 | 6  | 35 | 2. married  | 2. oly read  |
| 28 | 0 | 3400  | 1. yes | 98  | 1200  | 5  | 29 | 2. married  | 5. college & |
| 11 | 0 | 3500  | 1. yes | 72  | 9400  | 6  | 19 | 2. married  | 3. grade 1-  |



48

2

3000 1. yes

99

14400

6

35 2. married 2. oly read

|                                            |        |                    |      |            |
|--------------------------------------------|--------|--------------------|------|------------|
| 4. grade 9-5. house w 1. amhara 1. rural   | 0. no  | 1. iodized 1. yes  | 42.8 | 0. no      |
| 3. grade 1-5. house w 1. amhara 1. rural   | 1. yes | 0. non iod: 1. yes | 38.5 | 0. no      |
| 5. college i 1. governm 1. amhara 2. urban | 0. no  | 1. iodized 1. yes  | 38.8 | 0.6 0. no  |
| 4. grade 9-5. house w 1. amhara 2. urban   | 0. no  | 1. iodized 1. yes  | 38.5 | 8 0. no    |
| 5. college i 2. merchat 1. amhara 2. urban | 0. no  | 1. iodized 1. yes  | 38.8 | 2 0. no    |
| 4. grade 9-5. house w 1. amhara 2. urban   | 0. no  | 1. iodized 1. yes  | 38.5 | 5 0. no    |
| 5. college i 1. governm 1. amhara 2. urban | 0. no  | 1. iodized 0. no   | 38.5 | 0. no      |
| 3. grade 1-2. merchat 1. amhara 2. urban   | 0. no  | 0. non iod: 0. no  | 42.8 | 11 0. no   |
| 3. grade 1-5. house w 1. amhara 2. urban   | 0. no  | 1. iodized 1. yes  | 38.5 | 3 0. no    |
| 5. college i 5. house w 1. amhara 2. urban | 0. no  | 1. iodized 0. no   | 38.8 | 0. no      |
| 3. grade 1-5. house w 1. amhara 1. rural   | 1. yes | 1. iodized 1. yes  | 38.5 | 8 0. no    |
| 5. college i 1. governm 1. amhara 1. rural | 0. no  | 1. iodized 1. yes  | 38.5 | 0. no      |
| 4. grade 9-5. house w 1. amhara 2. urban   | 0. no  | 1. iodized 1. yes  | 38.5 | 0. no      |
| 3. grade 1-5. house w 1. amhara 2. urban   | 0. no  | 1. iodized 1. yes  | 38.5 | 0. no      |
| 4. grade 9-5. house w 1. amhara 2. urban   | 0. no  | 1. iodized 1. yes  | 35   | 13 1. yes  |
| 3. grade 1-5. house w 1. amhara 1. rural   | 0. no  | 0. non iod: 1. yes | 40   | 10 0. no   |
| 2. oly read 5. house w 1. amhara 2. urban  | 0. no  | 0. non iod: 1. yes | 38.5 | 10 0. no   |
| 4. grade 9-5. house w 1. amhara 1. rural   | 0. no  | 0. non iod: 1. yes | 38.5 | 2 0. no    |
| 5. college i 1. governm 1. amhara 2. urban | 0. no  | 0. non iod: 1. yes | 38.5 | 0. no      |
| 4. grade 9-2. merchat 1. amhara 2. urban   | 0. no  | 1. iodized 0. no   | 38.6 | 3.5 0. no  |
| 3. grade 1-1. governm 1. amhara 1. rural   | 0. no  | 1. iodized 1. yes  | 38.5 | 4 0. no    |
| 3. grade 1-5. house w 1. amhara 1. rural   | 0. no  | 0. no              |      | 0. no      |
| 4. grade 9-1. governm 1. amhara 2. urban   | 0. no  | 1. iodized 1. yes  | 38.1 | 10 0. no   |
| 4. grade 9-5. house w 1. amhara 2. urban   | 0. no  | 1. iodized 1. yes  | 37   | 4 0. no    |
| 5. college i 1. governm 1. amhara 2. urban | 0. no  | 1. iodized 1. yes  | 38   | 0. no      |
| 3. grade 1-5. house w 1. amhara 2. urban   | 0. no  | 0. non iod: 0. no  |      | 1. yes     |
| 5. college i 5. house w 1. amhara 2. urban | 1. yes | 1. iodized 1. yes  | 38.5 | 1 0. no    |
| 2. oly read 6. others 1. amhara 1. rural   | 0. no  | 0. non iod: 0. no  | 38.5 | 2 0. no    |
| 5. college i 1. governm 1. amhara 2. urban | 0. no  | 1. iodized 1. yes  | 37   | 1.3 0. no  |
| 3. grade 1-5. house w 1. amhara 2. urban   | 0. no  | 0. non iod: 0. no  | 38.5 | 3 1. yes   |
| 5. college i 1. governm 1. amhara 2. urban | 0. no  | 1. iodized 1. yes  | 40   | 0 0. no    |
| 4. grade 9-5. house w 1. amhara 2. urban   | 0. no  | 1. iodized 1. yes  | 39   | 0. no      |
| 5. college i 5. house w 1. amhara 2. urban | 0. no  | 1. iodized 1. yes  | 42   | 0 0. no    |
| 4. grade 9-5. house w 2. oromo 2. urban    | 0. no  | 1. iodized 1. yes  | 41   | 0. no      |
| 2. oly read 5. house w 1. amhara 1. rural  | 0. no  | 1. iodized 1. yes  | 38.5 | 4 0. no    |
| 3. grade 1-2. merchat 1. amhara 2. urban   | 0. no  | 1. iodized 1. yes  | 38.5 | 0. no      |
| 2. oly read 5. house w 1. amhara 1. rural  | 0. no  | 0. non iod: 1. yes | 37.3 | 2 0. no    |
| 3. grade 1-5. house w 1. amhara 1. rural   | 0. no  | 0. non iod: 1. yes | 40   | 10 0. no   |
| 3. grade 1-2. merchat 1. amhara 2. urban   | 0. no  | 0. no              | 38.5 | 2 0. no    |
| 2. oly read 5. house w 1. amhara 2. urban  | 0. no  | 1. iodized 1. yes  | 38.5 | 5 1. yes   |
| 2. oly read 5. house w 1. amhara 1. rural  | 0. no  | 1. iodized 1. yes  | 38.5 | 6 0. no    |
| 2. oly read 5. house w 1. amhara 1. rural  | 0. no  | 1. iodized 0. no   | 38.5 | 9 0. no    |
| 4. grade 9-5. house w 1. amhara 2. urban   | 0. no  | 1. iodized 0. no   | 38.5 | 0. no      |
| 2. oly read 5. house w 1. amhara 1. rural  | 0. no  | 0. non iod: 0. no  | 38.5 | 2 0. no    |
| 2. oly read 5. house w 1. amhara 1. rural  | 0. no  | 0. non iod: 1. yes | 38.5 | 3 0. no    |
| 2. oly read 2. merchat 1. amhara 2. urban  | 0. no  | 1. iodized 1. yes  | 40.5 | 3 0. no    |
| 5. college i 5. house w 1. amhara 2. urban | 0. no  | 0. non iod: 1. yes | 38.5 | 0. no      |
| 5. college i 5. house w 1. amhara 2. urban | 0. no  | 1. iodized 1. yes  | 40   | 0. no      |
| 5. college i 1. governm 1. amhara 2. urban | 0. no  | 1. iodized 1. yes  | 39.5 | 0. no      |
| 5. college i 1. governm 1. amhara 2. urban | 0. no  | 1. iodized 1. yes  | 38.5 | 2.75 0. no |
| 5. college i 5. house w 1. amhara 2. urban | 1. yes | 1. iodized 0. no   | 38.5 | 11 0. no   |
| 5. college i 1. governm 1. amhara 2. urban | 0. no  | 1. iodized 1. yes  | 40   | 0. no      |

|              |               |           |          |        |            |        |      |      |        |
|--------------|---------------|-----------|----------|--------|------------|--------|------|------|--------|
| 5. college   | 1. government | 1. amhara | 2. urban | 0. no  | 1. iodized | 1. yes | 39   | 4    | 0. no  |
| 2. only read | 5. house w    | 1. amhara | 2. urban | 0. no  | 1. iodized | 1. yes | 36   | 7    | 0. no  |
| 3. grade 1-  | 2. merchant   | 2. oromo  | 2. urban | 0. no  | 1. iodized | 1. yes | 39   | 2.5  | 0. no  |
| 5. college   | 1. government | 1. amhara | 2. urban | 0. no  |            | 0. no  |      |      | 0. no  |
| 5. college   | 5. house w    | 1. amhara | 2. urban | 0. no  | 1. iodized | 1. yes | 38   |      | 0. no  |
| 3. grade 1-  | 5. house w    | 1. amhara | 1. rural | 0. no  | 0. non iod | 0. no  | 38.5 |      | 0. no  |
| 5. college   | 1. government | 1. amhara | 2. urban | 0. no  | 1. iodized | 0. no  | 40   | 2.6  | 0. no  |
| 3. grade 1-  | 3. private    | 4. others | 1. rural | 1. yes | 1. iodized | 0. no  | 41   | 40   | 0. no  |
| 4. grade 9-  | 5. house w    | 1. amhara | 1. rural | 0. no  | 1. iodized | 0. no  | 38.5 |      | 0. no  |
| 4. grade 9-  | 5. house w    | 1. amhara | 2. urban | 0. no  | 1. iodized | 0. no  | 38.5 |      | 0. no  |
| 5. college   | 1. government | 1. amhara | 2. urban | 0. no  | 1. iodized | 1. yes | 38   |      | 0. no  |
| 2. only read | 5. house w    | 1. amhara | 2. urban | 0. no  | 0. non iod | 1. yes | 44   | 3    | 1. yes |
| 5. college   | 5. house w    | 1. amhara | 2. urban | 1. yes | 1. iodized | 1. yes | 38.5 | 3    | 1. yes |
| 2. only read | 5. house w    | 1. amhara | 1. rural | 0. no  | 1. iodized | 1. yes | 39   | 2.5  | 0. no  |
| 5. college   | 5. house w    | 1. amhara | 2. urban | 0. no  | 1. iodized | 1. yes | 38.5 | 3    | 0. no  |
| 3. grade 1-  | 5. house w    | 1. amhara | 2. urban | 0. no  | 1. iodized | 1. yes | 38.5 |      | 0. no  |
| 4. grade 9-  | 5. house w    | 1. amhara | 1. rural | 0. no  | 1. iodized | 1. yes | 42.8 |      | 0. no  |
| 4. grade 9-  | 5. house w    | 1. amhara | 2. urban | 0. no  | 1. iodized | 1. yes | 38.5 | 8    | 0. no  |
| 5. college   | 2. merchant   | 1. amhara | 2. urban | 0. no  | 1. iodized | 1. yes | 38.8 | 2    | 0. no  |
| 3. grade 1-  | 5. house w    | 1. amhara | 2. urban | 0. no  | 1. iodized | 1. yes | 38.5 | 3    | 0. no  |
| 5. college   | 5. house w    | 1. amhara | 2. urban | 0. no  | 1. iodized | 0. no  | 38.8 |      | 0. no  |
| 3. grade 1-  | 5. house w    | 1. amhara | 1. rural | 1. yes | 1. iodized | 1. yes | 38.5 | 8    | 0. no  |
| 5. college   | 1. government | 1. amhara | 1. rural | 0. no  | 1. iodized | 1. yes | 38.5 |      | 0. no  |
| 3. grade 1-  | 5. house w    | 1. amhara | 2. urban | 0. no  | 1. iodized | 1. yes | 38.5 |      | 0. no  |
| 4. grade 9-  | 2. merchant   | 1. amhara | 2. urban | 0. no  | 1. iodized | 0. no  | 38.6 | 3.5  | 0. no  |
| 3. grade 1-  | 1. government | 1. amhara | 1. rural | 0. no  | 1. iodized | 1. yes | 38.5 | 4    | 0. no  |
| 4. grade 9-  | 5. house w    | 1. amhara | 2. urban | 0. no  | 1. iodized | 1. yes | 37   | 4    | 0. no  |
| 5. college   | 1. government | 1. amhara | 2. urban | 0. no  | 1. iodized | 1. yes | 37   | 1.3  | 0. no  |
| 5. college   | 1. government | 1. amhara | 2. urban | 0. no  | 1. iodized | 1. yes | 40   | 0    | 0. no  |
| 4. grade 9-  | 5. house w    | 1. amhara | 2. urban | 0. no  | 1. iodized | 1. yes | 39   |      | 0. no  |
| 4. grade 9-  | 5. house w    | 2. oromo  | 2. urban | 0. no  | 1. iodized | 1. yes | 41   |      | 0. no  |
| 4. grade 9-  | 5. house w    | 1. amhara | 2. urban | 0. no  | 1. iodized | 0. no  | 38.5 |      | 0. no  |
| 5. college   | 1. government | 1. amhara | 2. urban | 0. no  | 1. iodized | 1. yes | 38.5 | 2.75 | 0. no  |
| 3. grade 1-  | 3. private    | 4. others | 1. rural | 1. yes | 1. iodized | 0. no  | 41   | 40   | 0. no  |
| 5. college   | 5. house w    | 1. amhara | 2. urban | 1. yes | 1. iodized | 1. yes | 38.5 | 3    | 1. yes |
| 2. only read | 5. house w    | 1. amhara | 1. rural | 0. no  | 1. iodized | 1. yes | 39   | 2.5  | 0. no  |
| 5. college   | 1. government | 1. amhara | 2. urban | 0. no  | 1. iodized | 1. yes | 38.8 | 0.6  | 0. no  |
| 5. college   | 2. merchant   | 1. amhara | 2. urban | 0. no  | 1. iodized | 1. yes | 38.8 | 2    | 0. no  |
| 4. grade 9-  | 5. house w    | 1. amhara | 2. urban | 0. no  | 1. iodized | 1. yes | 35   | 13   | 1. yes |
| 2. only read | 5. house w    | 1. amhara | 2. urban | 0. no  | 0. non iod | 1. yes | 38.5 | 10   | 0. no  |
| 4. grade 9-  | 5. house w    | 1. amhara | 1. rural | 0. no  | 0. non iod | 1. yes | 38.5 | 2    | 0. no  |
| 5. college   | 1. government | 1. amhara | 2. urban | 0. no  | 0. non iod | 1. yes | 38.5 |      | 0. no  |
| 3. grade 1-  | 5. house w    | 1. amhara | 1. rural | 0. no  |            | 0. no  |      |      | 0. no  |
| 4. grade 9-  | 1. government | 1. amhara | 2. urban | 0. no  | 1. iodized | 1. yes | 38.1 | 10   | 0. no  |
| 4. grade 9-  | 5. house w    | 1. amhara | 2. urban | 0. no  | 1. iodized | 1. yes | 37   | 4    | 0. no  |
| 5. college   | 1. government | 1. amhara | 2. urban | 0. no  | 1. iodized | 1. yes | 38   |      | 0. no  |
| 4. grade 9-  | 5. house w    | 1. amhara | 2. urban | 0. no  | 1. iodized | 1. yes | 39   |      | 0. no  |
| 4. grade 9-  | 5. house w    | 1. amhara | 2. urban | 0. no  | 1. iodized | 0. no  | 38.5 |      | 0. no  |
| 2. only read | 5. house w    | 1. amhara | 1. rural | 0. no  | 0. non iod | 0. no  | 38.5 | 2    | 0. no  |
| 5. college   | 5. house w    | 1. amhara | 2. urban | 1. yes | 1. iodized | 0. no  | 38.5 | 11   | 0. no  |
| 5. college   | 1. government | 1. amhara | 2. urban | 0. no  | 1. iodized | 1. yes | 39   | 4    | 0. no  |
| 5. college   | 1. government | 1. amhara | 2. urban | 0. no  | 1. iodized | 1. yes | 38   |      | 0. no  |

|                                            |        |              |        |      |           |
|--------------------------------------------|--------|--------------|--------|------|-----------|
| 3. grade 1-5. house w 1. amhara 1. rural   | 1. yes | 1. iodized   | 1. yes | 38.5 | 8 0. no   |
| 5. college i 1. governm 1. amhara 1. rural | 0. no  | 1. iodized   | 1. yes | 38.5 | 0. no     |
| 5. college i 5. house w 1. amhara 2. urban | 1. yes | 1. iodized   | 1. yes | 38.5 | 3 1. yes  |
| 2. oly read 5. house w 1. amhara 1. rural  | 0. no  | 1. iodized   | 1. yes | 39   | 2.5 0. no |
| 4. grade 9-5. house w 1. amhara 1. rural   | 0. no  | 1. iodized   | 1. yes | 42.8 | 0. no     |
| 3. grade 1-5. house w 1. amhara 1. rural   | 1. yes | 0. non iodiz | 1. yes | 38.5 | 0. no     |
| 5. college i 1. governm 1. amhara 2. urban | 0. no  | 1. iodized   | 1. yes | 38.8 | 0.6 0. no |
| 4. grade 9-5. house w 1. amhara 2. urban   | 0. no  | 1. iodized   | 1. yes | 38.5 | 8 0. no   |
| 5. college i 2. merchat 1. amhara 2. urban | 0. no  | 1. iodized   | 1. yes | 38.8 | 2 0. no   |
| 5. college i 1. governm 1. amhara 2. urban | 0. no  | 1. iodized   | 0. no  | 38.5 | 0. no     |
| 3. grade 1-5. house w 1. amhara 2. urban   | 0. no  | 1. iodized   | 1. yes | 38.5 | 3 0. no   |
| 5. college i 5. house w 1. amhara 2. urban | 0. no  | 1. iodized   | 0. no  | 38.8 | 0. no     |
| 5. college i 1. governm 1. amhara 1. rural | 0. no  | 1. iodized   | 1. yes | 38.5 | 0. no     |
| 3. grade 1-5. house w 1. amhara 2. urban   | 0. no  | 1. iodized   | 1. yes | 38.5 | 0. no     |
| 4. grade 9-5. house w 1. amhara 2. urban   | 0. no  | 1. iodized   | 1. yes | 35   | 13 1. yes |
| 3. grade 1-5. house w 1. amhara 1. rural   | 0. no  | 0. non iodiz | 1. yes | 40   | 10 0. no  |
| 2. oly read 5. house w 1. amhara 2. urban  | 0. no  | 0. non iodiz | 1. yes | 38.5 | 10 0. no  |
| 4. grade 9-2. merchat 1. amhara 2. urban   | 0. no  | 1. iodized   | 0. no  | 38.6 | 3.5 0. no |
| 4. grade 9-5. house w 1. amhara 2. urban   | 0. no  | 1. iodized   | 1. yes | 37   | 4 0. no   |
| 5. college i 1. governm 1. amhara 2. urban | 0. no  | 1. iodized   | 1. yes | 38   | 0. no     |
| 2. oly read 6. others 1. amhara 1. rural   | 0. no  | 0. non iodiz | 0. no  | 38.5 | 2 0. no   |
| 5. college i 1. governm 1. amhara 2. urban | 0. no  | 1. iodized   | 1. yes | 40   | 0 0. no   |
| 4. grade 9-5. house w 1. amhara 2. urban   | 0. no  | 1. iodized   | 1. yes | 39   | 0. no     |
| 5. college i 5. house w 1. amhara 2. urban | 0. no  | 1. iodized   | 1. yes | 42   | 0 0. no   |
| 2. oly read 5. house w 1. amhara 1. rural  | 0. no  | 1. iodized   | 1. yes | 38.5 | 4 0. no   |
| 2. oly read 5. house w 1. amhara 1. rural  | 0. no  | 0. non iodiz | 1. yes | 37.3 | 2 0. no   |
| 3. grade 1-2. merchat 1. amhara 2. urban   | 0. no  |              | 0. no  | 38.5 | 2 0. no   |
| 2. oly read 5. house w 1. amhara 1. rural  | 0. no  | 1. iodized   | 1. yes | 38.5 | 6 0. no   |
| 2. oly read 5. house w 1. amhara 1. rural  | 0. no  | 1. iodized   | 0. no  | 38.5 | 9 0. no   |
| 4. grade 9-5. house w 1. amhara 2. urban   | 0. no  | 1. iodized   | 0. no  | 38.5 | 0. no     |
| 2. oly read 5. house w 1. amhara 1. rural  | 0. no  | 0. non iodiz | 0. no  | 38.5 | 2 0. no   |
| 2. oly read 2. merchat 1. amhara 2. urban  | 0. no  | 1. iodized   | 1. yes | 40.5 | 3 0. no   |
| 5. college i 5. house w 1. amhara 2. urban | 0. no  | 1. iodized   | 1. yes | 40   | 0. no     |
| 5. college i 1. governm 1. amhara 2. urban | 0. no  | 1. iodized   | 1. yes | 40   | 0. no     |
| 5. college i 1. governm 1. amhara 2. urban | 0. no  | 1. iodized   | 1. yes | 39   | 4 0. no   |
| 5. college i 1. governm 1. amhara 2. urban | 0. no  |              | 0. no  |      | 0. no     |
| 5. college i 1. governm 1. amhara 2. urban | 0. no  | 1. iodized   | 0. no  | 40   | 2.6 0. no |
| 4. grade 9-5. house w 1. amhara 2. urban   | 0. no  | 1. iodized   | 0. no  | 38.5 | 0. no     |
| 2. oly read 5. house w 1. amhara 2. urban  | 0. no  | 0. non iodiz | 1. yes | 44   | 3 1. yes  |
| 2. oly read 5. house w 1. amhara 1. rural  | 0. no  | 1. iodized   | 1. yes | 39   | 2.5 0. no |
| 5. college i 5. house w 1. amhara 2. urban | 0. no  | 1. iodized   | 1. yes | 38.5 | 3 0. no   |
| 3. grade 1-5. house w 1. amhara 2. urban   | 0. no  | 1. iodized   | 1. yes | 38.5 | 0. no     |
| 3. grade 1-5. house w 1. amhara 2. urban   | 0. no  | 1. iodized   | 1. yes | 38.5 | 3 0. no   |
| 5. college i 5. house w 1. amhara 2. urban | 0. no  | 1. iodized   | 0. no  | 38.8 | 0. no     |
| 3. grade 1-5. house w 1. amhara 1. rural   | 1. yes | 1. iodized   | 1. yes | 38.5 | 8 0. no   |
| 5. college i 1. governm 1. amhara 1. rural | 0. no  | 1. iodized   | 1. yes | 38.5 | 0. no     |
| 3. grade 1-1. governm 1. amhara 1. rural   | 0. no  | 1. iodized   | 1. yes | 38.5 | 4 0. no   |
| 4. grade 9-5. house w 2. oromo 2. urban    | 0. no  | 1. iodized   | 1. yes | 41   | 0. no     |
| 5. college i 5. house w 1. amhara 2. urban | 1. yes | 1. iodized   | 1. yes | 38.5 | 3 1. yes  |
| 2. oly read 5. house w 1. amhara 1. rural  | 0. no  | 1. iodized   | 1. yes | 39   | 2.5 0. no |
| 5. college i 1. governm 1. amhara 2. urban | 0. no  | 1. iodized   | 1. yes | 38.8 | 0.6 0. no |
| 4. grade 9-5. house w 1. amhara 2. urban   | 0. no  | 1. iodized   | 1. yes | 35   | 13 1. yes |

|                                            |        |              |        |      |      |        |
|--------------------------------------------|--------|--------------|--------|------|------|--------|
| 2. oly read 5. house w 1. amhara 2. urban  | 0. no  | 0. non iodiz | 1. yes | 38.5 | 10   | 0. no  |
| 4. grade 9-5. house w 1. amhara 1. rural   | 0. no  | 0. non iodiz | 1. yes | 38.5 | 2    | 0. no  |
| 5. college i 2. merchat 1. amhara 2. urban | 0. no  | 1. iodized   | 1. yes | 38.8 | 2    | 0. no  |
| 5. college i 1. goverm 1. amhara 2. urban  | 0. no  | 1. iodized   | 0. no  | 38.5 |      | 0. no  |
| 3. grade 1-5. house w 1. amhara 2. urban   | 0. no  | 1. iodized   | 1. yes | 38.5 | 3    | 0. no  |
| 4. grade 9-5. house w 1. amhara 2. urban   | 0. no  | 1. iodized   | 1. yes | 38.5 |      | 0. no  |
| 3. grade 1-5. house w 1. amhara 2. urban   | 0. no  | 1. iodized   | 1. yes | 38.5 |      | 0. no  |
| 4. grade 9-2. merchat 1. amhara 2. urban   | 0. no  | 1. iodized   | 0. no  | 38.6 | 3.5  | 0. no  |
| 3. grade 1-5. house w 1. amhara 1. rural   | 0. no  |              | 0. no  |      |      | 0. no  |
| 3. grade 1-5. house w 1. amhara 2. urban   | 0. no  | 0. non iodiz | 0. no  |      |      | 1. yes |
| 3. grade 1-2. merchat 1. amhara 2. urban   | 0. no  | 1. iodized   | 1. yes | 38.5 |      | 0. no  |
| 4. grade 9-5. house w 1. amhara 2. urban   | 0. no  | 1. iodized   | 0. no  | 38.5 |      | 0. no  |
| 2. oly read 5. house w 1. amhara 1. rural  | 0. no  | 0. non iodiz | 0. no  | 38.5 | 2    | 0. no  |
| 2. oly read 5. house w 1. amhara 1. rural  | 0. no  | 0. non iodiz | 1. yes | 38.5 | 3    | 0. no  |
| 5. college i 5. house w 1. amhara 2. urban | 0. no  | 0. non iodiz | 1. yes | 38.5 |      | 0. no  |
| 5. college i 1. goverm 1. amhara 2. urban  | 0. no  | 1. iodized   | 1. yes | 38.5 | 2.75 | 0. no  |
| 5. college i 5. house w 1. amhara 2. urban | 1. yes | 1. iodized   | 0. no  | 38.5 | 11   | 0. no  |
| 5. college i 1. goverm 1. amhara 2. urban  | 0. no  | 1. iodized   | 1. yes | 39   | 4    | 0. no  |
| 3. grade 1-2. merchat 2. oromo 2. urban    | 0. no  | 1. iodized   | 1. yes | 39   | 2.5  | 0. no  |
| 5. college i 5. house w 1. amhara 2. urban | 0. no  | 1. iodized   | 1. yes | 38   |      | 0. no  |
| 3. grade 1-5. house w 1. amhara 1. rural   | 0. no  | 0. non iodiz | 0. no  | 38.5 |      | 0. no  |
| 5. college i 1. goverm 1. amhara 2. urban  | 0. no  | 1. iodized   | 0. no  | 40   | 2.6  | 0. no  |
| 2. oly read 5. house w 1. amhara 2. urban  | 0. no  | 0. non iodiz | 1. yes | 44   | 3    | 1. yes |
| 2. oly read 5. house w 1. amhara 1. rural  | 0. no  | 1. iodized   | 1. yes | 39   | 2.5  | 0. no  |
| 4. grade 9-5. house w 1. amhara 1. rural   | 0. no  | 1. iodized   | 1. yes | 42.8 |      | 0. no  |
| 4. grade 9-5. house w 1. amhara 2. urban   | 0. no  | 1. iodized   | 1. yes | 38.5 | 8    | 0. no  |
| 3. grade 1-5. house w 1. amhara 2. urban   | 0. no  | 1. iodized   | 1. yes | 38.5 | 3    | 0. no  |
| 4. grade 9-5. house w 1. amhara 2. urban   | 0. no  | 1. iodized   | 1. yes | 37   | 4    | 0. no  |
| 5. college i 1. goverm 1. amhara 2. urban  | 0. no  | 1. iodized   | 1. yes | 40   | 0    | 0. no  |
| 4. grade 9-5. house w 2. oromo 2. urban    | 0. no  | 1. iodized   | 1. yes | 41   |      | 0. no  |
| 4. grade 9-5. house w 1. amhara 2. urban   | 0. no  | 1. iodized   | 0. no  | 38.5 |      | 0. no  |
| 5. college i 5. house w 1. amhara 2. urban | 1. yes | 1. iodized   | 1. yes | 38.5 | 3    | 1. yes |
| 2. oly read 5. house w 1. amhara 1. rural  | 0. no  | 1. iodized   | 1. yes | 39   | 2.5  | 0. no  |
| 5. college i 2. merchat 1. amhara 2. urban | 0. no  | 1. iodized   | 1. yes | 38.8 | 2    | 0. no  |
| 4. grade 9-5. house w 1. amhara 2. urban   | 0. no  | 1. iodized   | 1. yes | 39   |      | 0. no  |
| 3. grade 1-5. house w 1. amhara 1. rural   | 1. yes | 1. iodized   | 1. yes | 38.5 | 8    | 0. no  |
| 5. college i 1. goverm 1. amhara 2. urban  | 0. no  | 1. iodized   | 1. yes | 38.8 | 0.6  | 0. no  |
| 5. college i 2. merchat 1. amhara 2. urban | 0. no  | 1. iodized   | 1. yes | 38.8 | 2    | 0. no  |
| 3. grade 1-5. house w 1. amhara 2. urban   | 0. no  | 1. iodized   | 1. yes | 38.5 | 3    | 0. no  |
| 3. grade 1-5. house w 1. amhara 1. rural   | 0. no  | 0. non iodiz | 1. yes | 40   | 10   | 0. no  |
| 5. college i 1. goverm 1. amhara 2. urban  | 0. no  | 1. iodized   | 1. yes | 40   |      | 0. no  |
| 5. college i 5. house w 1. amhara 2. urban | 0. no  | 1. iodized   | 1. yes | 42   |      | 0. no  |
| 3. grade 1-2. merchat 1. amhara 2. urban   | 0. no  |              | 0. no  | 38.5 | 2    | 0. no  |
| 4. grade 9-5. house w 1. amhara 2. urban   | 0. no  | 1. iodized   | 0. no  | 38.5 |      | 0. no  |
| 2. oly read 5. house w 1. amhara 1. rural  | 0. no  | 0. non iodiz | 0. no  | 38.5 | 2    | 0. no  |
| 5. college i 1. goverm 1. amhara 2. urban  | 0. no  | 1. iodized   | 1. yes | 40   |      | 0. no  |
| 5. college i 1. goverm 1. amhara 2. urban  | 0. no  |              | 0. no  |      |      | 0. no  |
| 5. college i 1. goverm 1. amhara 2. urban  | 0. no  | 1. iodized   | 0. no  | 40   | 2.6  | 0. no  |
| 4. grade 9-5. house w 1. amhara 2. urban   | 0. no  | 1. iodized   | 0. no  | 38.5 |      | 0. no  |
| 3. grade 1-5. house w 1. amhara 2. urban   | 0. no  | 1. iodized   | 1. yes | 38.5 |      | 0. no  |
| 3. grade 1-5. house w 1. amhara 1. rural   | 1. yes | 1. iodized   | 1. yes | 38.5 | 8    | 0. no  |
| 5. college i 1. goverm 1. amhara 1. rural  | 0. no  | 1. iodized   | 1. yes | 38.5 |      | 0. no  |

|               |            |           |          |        |            |        |      |      |        |
|---------------|------------|-----------|----------|--------|------------|--------|------|------|--------|
| 5. college    | 2. merchat | 1. amhara | 2. urban | 0. no  | 1. iodized | 1. yes | 38.8 | 2    | 0. no  |
| 3. grade 1-5. | house w    | 1. amhara | 2. urban | 0. no  | 1. iodized | 1. yes | 38.5 |      | 0. no  |
| 3. grade 1-5. | house w    | 1. amhara | 1. rural | 0. no  | 0. non iod | 1. yes | 40   | 10   | 0. no  |
| 5. college    | 1. goverm  | 1. amhara | 2. urban | 0. no  | 1. iodized | 1. yes | 38   |      | 0. no  |
| 2. oly read   | 6. others  | 1. amhara | 1. rural | 0. no  | 0. non iod | 0. no  | 38.5 | 2    | 0. no  |
| 4. grade 9-5. | house w    | 2. oromo  | 2. urban | 0. no  | 1. iodized | 1. yes | 41   |      | 0. no  |
| 3. grade 1-2. | merchat    | 1. amhara | 2. urban | 0. no  |            | 0. no  | 38.5 | 2    | 0. no  |
| 5. college    | 5. house w | 1. amhara | 2. urban | 0. no  | 1. iodized | 1. yes | 40   |      | 0. no  |
| 5. college    | 1. goverm  | 1. amhara | 2. urban | 0. no  | 1. iodized | 1. yes | 38.5 | 2.75 | 0. no  |
| 5. college    | 1. goverm  | 1. amhara | 2. urban | 0. no  | 1. iodized | 1. yes | 40   |      | 0. no  |
| 5. college    | 1. goverm  | 1. amhara | 2. urban | 0. no  |            | 0. no  |      |      | 0. no  |
| 5. college    | 5. house w | 1. amhara | 2. urban | 1. yes | 1. iodized | 1. yes | 38.5 | 3    | 1. yes |
| 5. college    | 2. merchat | 1. amhara | 2. urban | 0. no  | 1. iodized | 1. yes | 38.8 | 2    | 0. no  |
| 5. college    | 5. house w | 1. amhara | 2. urban | 0. no  | 1. iodized | 0. no  | 38.8 |      | 0. no  |
| 3. grade 1-5. | house w    | 1. amhara | 1. rural | 1. yes | 1. iodized | 1. yes | 38.5 | 8    | 0. no  |
| 5. college    | 1. goverm  | 1. amhara | 1. rural | 0. no  | 1. iodized | 1. yes | 38.5 |      | 0. no  |
| 3. grade 1-5. | house w    | 1. amhara | 2. urban | 0. no  | 1. iodized | 1. yes | 38.5 |      | 0. no  |
| 4. grade 9-5. | house w    | 1. amhara | 2. urban | 0. no  | 1. iodized | 1. yes | 37   | 4    | 0. no  |
| 4. grade 9-5. | house w    | 1. amhara | 2. urban | 0. no  | 1. iodized | 0. no  | 38.5 |      | 0. no  |
| 5. college    | 1. goverm  | 1. amhara | 2. urban | 0. no  | 1. iodized | 1. yes | 38.5 | 2.75 | 0. no  |
| 3. grade 1-3. | private    | 4. others | 1. rural | 1. yes | 1. iodized | 0. no  | 41   | 40   | 0. no  |
| 4. grade 9-5. | house w    | 1. amhara | 1. rural | 0. no  | 0. non iod | 1. yes | 38.5 | 2    | 0. no  |
| 5. college    | 1. goverm  | 1. amhara | 2. urban | 0. no  | 1. iodized | 1. yes | 38   |      | 0. no  |
| 2. oly read   | 5. house w | 1. amhara | 1. rural | 0. no  | 0. non iod | 0. no  | 38.5 | 2    | 0. no  |
| 3. grade 1-5. | house w    | 1. amhara | 1. rural | 1. yes | 1. iodized | 1. yes | 38.5 | 8    | 0. no  |
| 5. college    | 5. house w | 1. amhara | 2. urban | 1. yes | 1. iodized | 1. yes | 38.5 | 3    | 1. yes |
| 3. grade 1-5. | house w    | 1. amhara | 1. rural | 1. yes | 0. non iod | 1. yes | 38.5 |      | 0. no  |
| 3. grade 1-5. | house w    | 1. amhara | 1. rural | 0. no  | 0. non iod | 1. yes | 40   | 10   | 0. no  |
| 5. college    | 1. goverm  | 1. amhara | 2. urban | 0. no  | 1. iodized | 1. yes | 40   |      | 0. no  |
| 5. college    | 5. house w | 1. amhara | 2. urban | 0. no  | 1. iodized | 1. yes | 42   |      | 0. no  |
| 2. oly read   | 5. house w | 1. amhara | 1. rural | 0. no  | 0. non iod | 1. yes | 37.3 | 2    | 0. no  |
| 2. oly read   | 5. house w | 1. amhara | 1. rural | 0. no  | 1. iodized | 1. yes | 38.5 | 6    | 0. no  |
| 4. grade 9-5. | house w    | 1. amhara | 2. urban | 0. no  | 1. iodized | 0. no  | 38.5 |      | 0. no  |
| 2. oly read   | 5. house w | 1. amhara | 1. rural | 0. no  | 0. non iod | 0. no  | 38.5 | 2    | 0. no  |
| 5. college    | 5. house w | 1. amhara | 2. urban | 0. no  | 1. iodized | 1. yes | 40   |      | 0. no  |
| 2. oly read   | 5. house w | 1. amhara | 1. rural | 0. no  | 1. iodized | 1. yes | 39   | 2.5  | 0. no  |
| 5. college    | 1. goverm  | 1. amhara | 2. urban | 0. no  | 1. iodized | 1. yes | 38.8 | 0.6  | 0. no  |
| 4. grade 9-5. | house w    | 1. amhara | 2. urban | 0. no  | 1. iodized | 1. yes | 35   | 13   | 1. yes |
| 3. grade 1-5. | house w    | 1. amhara | 2. urban | 0. no  | 1. iodized | 1. yes | 38.5 | 3    | 0. no  |
| 4. grade 9-5. | house w    | 1. amhara | 2. urban | 0. no  | 1. iodized | 1. yes | 38.5 |      | 0. no  |
| 3. grade 1-5. | house w    | 1. amhara | 2. urban | 0. no  | 1. iodized | 1. yes | 38.5 |      | 0. no  |
| 4. grade 9-2. | merchat    | 1. amhara | 2. urban | 0. no  | 1. iodized | 0. no  | 38.6 | 3.5  | 0. no  |
| 3. grade 1-5. | house w    | 1. amhara | 2. urban | 0. no  | 0. non iod | 0. no  |      |      | 1. yes |
| 4. grade 9-5. | house w    | 1. amhara | 2. urban | 0. no  | 1. iodized | 0. no  | 38.5 |      | 0. no  |
| 3. grade 1-2. | merchat    | 2. oromo  | 2. urban | 0. no  | 1. iodized | 1. yes | 39   | 2.5  | 0. no  |
| 5. college    | 5. house w | 1. amhara | 2. urban | 0. no  | 1. iodized | 1. yes | 38   |      | 0. no  |
| 3. grade 1-5. | house w    | 1. amhara | 1. rural | 0. no  | 0. non iod | 0. no  | 38.5 |      | 0. no  |
| 2. oly read   | 5. house w | 1. amhara | 2. urban | 0. no  | 0. non iod | 1. yes | 44   | 3    | 1. yes |
| 5. college    | 2. merchat | 1. amhara | 2. urban | 0. no  | 1. iodized | 1. yes | 38.8 | 2    | 0. no  |
| 3. grade 1-2. | merchat    | 1. amhara | 2. urban | 0. no  |            | 0. no  | 38.5 | 2    | 0. no  |
| 5. college    | 5. house w | 1. amhara | 2. urban | 0. no  | 1. iodized | 0. no  | 38.8 |      | 0. no  |
| 3. grade 1-5. | house w    | 1. amhara | 1. rural | 0. no  | 0. non iod | 1. yes | 40   | 10   | 0. no  |

|                                            |        |              |        |      |      |        |
|--------------------------------------------|--------|--------------|--------|------|------|--------|
| 2. oly read 5. house w 1. amhara 2. urban  | 0. no  | 0. non iodiz | 1. yes | 38.5 | 10   | 0. no  |
| 3. grade 1-5. house w 1. amhara 1. rural   | 0. no  |              | 0. no  |      |      | 0. no  |
| 3. grade 1-2. merchat 1. amhara 2. urban   | 0. no  | 1. iodized   | 1. yes | 38.5 |      | 0. no  |
| 2. oly read 5. house w 1. amhara 2. urban  | 0. no  | 1. iodized   | 1. yes | 36   | 7    | 0. no  |
| 2. oly read 5. house w 1. amhara 1. rural  | 0. no  | 1. iodized   | 1. yes | 39   | 2.5  | 0. no  |
| 4. grade 9-5. house w 1. amhara 2. urban   | 0. no  | 1. iodized   | 1. yes | 38.5 | 8    | 0. no  |
| 3. grade 1-5. house w 1. amhara 2. urban   | 0. no  | 1. iodized   | 1. yes | 38.5 | 3    | 0. no  |
| 5. college i 1. governm 1. amhara 2. urban | 0. no  | 1. iodized   | 1. yes | 40   |      | 0. no  |
| 3. grade 1-3. private 4. others 1. rural   | 1. yes | 1. iodized   | 0. no  | 41   | 40   | 0. no  |
| 2. oly read 5. house w 1. amhara 1. rural  | 0. no  | 1. iodized   | 1. yes | 39   | 2.5  | 0. no  |
| 4. grade 9-5. house w 1. amhara 2. urban   | 0. no  | 1. iodized   | 1. yes | 39   |      | 0. no  |
| 5. college i 5. house w 1. amhara 2. urban | 1. yes | 1. iodized   | 0. no  | 38.5 | 11   | 0. no  |
| 3. grade 1-5. house w 1. amhara 1. rural   | 1. yes | 1. iodized   | 1. yes | 38.5 | 8    | 0. no  |
| 5. college i 5. house w 1. amhara 2. urban | 1. yes | 1. iodized   | 1. yes | 38.5 | 3    | 1. yes |
| 5. college i 1. governm 1. amhara 2. urban | 0. no  | 1. iodized   | 1. yes | 38.8 | 0.6  | 0. no  |
| 4. grade 9-5. house w 1. amhara 2. urban   | 0. no  | 1. iodized   | 1. yes | 35   | 13   | 1. yes |
| 3. grade 1-5. house w 1. amhara 1. rural   | 0. no  | 0. non iodiz | 1. yes | 40   | 10   | 0. no  |
| 4. grade 9-2. merchat 1. amhara 2. urban   | 0. no  | 1. iodized   | 0. no  | 38.6 | 3.5  | 0. no  |
| 2. oly read 6. others 1. amhara 1. rural   | 0. no  | 0. non iodiz | 0. no  | 38.5 | 2    | 0. no  |
| 4. grade 9-5. house w 1. amhara 2. urban   | 0. no  | 1. iodized   | 0. no  | 38.5 |      | 0. no  |
| 2. oly read 5. house w 1. amhara 2. urban  | 0. no  | 0. non iodiz | 1. yes | 44   | 3    | 1. yes |
| 3. grade 1-1. governm 1. amhara 1. rural   | 0. no  | 1. iodized   | 1. yes | 38.5 | 4    | 0. no  |
| 3. grade 1-5. house w 1. amhara 2. urban   | 0. no  | 1. iodized   | 1. yes | 38.5 |      | 0. no  |
| 3. grade 1-5. house w 1. amhara 1. rural   | 0. no  |              | 0. no  |      |      | 0. no  |
| 3. grade 1-2. merchat 1. amhara 2. urban   | 0. no  | 1. iodized   | 1. yes | 38.5 |      | 0. no  |
| 4. grade 9-5. house w 1. amhara 2. urban   | 0. no  | 1. iodized   | 0. no  | 38.5 |      | 0. no  |
| 5. college i 1. governm 1. amhara 2. urban | 0. no  | 1. iodized   | 1. yes | 39   | 4    | 0. no  |
| 2. oly read 5. house w 1. amhara 2. urban  | 0. no  | 0. non iodiz | 1. yes | 44   | 3    | 1. yes |
| 2. oly read 5. house w 1. amhara 1. rural  | 0. no  | 1. iodized   | 1. yes | 39   | 2.5  | 0. no  |
| 4. grade 9-5. house w 1. amhara 2. urban   | 0. no  | 1. iodized   | 1. yes | 38.5 | 8    | 0. no  |
| 4. grade 9-5. house w 1. amhara 2. urban   | 0. no  | 1. iodized   | 1. yes | 37   | 4    | 0. no  |
| 4. grade 9-5. house w 2. oromo 2. urban    | 0. no  | 1. iodized   | 1. yes | 41   |      | 0. no  |
| 4. grade 9-5. house w 1. amhara 2. urban   | 0. no  | 1. iodized   | 0. no  | 38.5 |      | 0. no  |
| 3. grade 1-5. house w 1. amhara 2. urban   | 0. no  | 1. iodized   | 1. yes | 38.5 | 3    | 0. no  |
| 5. college i 5. house w 1. amhara 2. urban | 0. no  | 1. iodized   | 1. yes | 42   |      | 0. no  |
| 2. oly read 5. house w 1. amhara 1. rural  | 0. no  | 0. non iodiz | 0. no  | 38.5 | 2    | 0. no  |
| 5. college i 1. governm 1. amhara 2. urban | 0. no  | 1. iodized   | 0. no  | 40   | 2.6  | 0. no  |
| 5. college i 1. governm 1. amhara 2. urban | 0. no  | 1. iodized   | 1. yes | 38.5 | 2.75 | 0. no  |
| 5. college i 5. house w 1. amhara 2. urban | 1. yes | 1. iodized   | 1. yes | 38.5 | 3    | 1. yes |
| 5. college i 2. merchat 1. amhara 2. urban | 0. no  | 1. iodized   | 1. yes | 38.8 | 2    | 0. no  |
| 3. grade 1-5. house w 1. amhara 2. urban   | 0. no  | 1. iodized   | 1. yes | 38.5 |      | 0. no  |
| 4. grade 9-5. house w 1. amhara 2. urban   | 0. no  | 1. iodized   | 1. yes | 37   | 4    | 0. no  |
| 4. grade 9-5. house w 1. amhara 2. urban   | 0. no  | 1. iodized   | 0. no  | 38.5 |      | 0. no  |
| 5. college i 1. governm 1. amhara 2. urban | 0. no  | 1. iodized   | 1. yes | 38.5 | 2.75 | 0. no  |
| 3. grade 1-3. private 4. others 1. rural   | 1. yes | 1. iodized   | 0. no  | 41   | 40   | 0. no  |
| 5. college i 5. house w 1. amhara 2. urban | 0. no  | 1. iodized   | 1. yes | 42   |      | 0. no  |
| 3. grade 1-5. house w 1. amhara 2. urban   | 0. no  | 1. iodized   | 1. yes | 38.5 |      | 0. no  |
| 4. grade 9-2. merchat 1. amhara 2. urban   | 0. no  | 1. iodized   | 0. no  | 38.6 | 3.5  | 0. no  |
| 4. grade 9-5. house w 1. amhara 1. rural   | 0. no  | 1. iodized   | 1. yes | 42.8 |      | 0. no  |
| 4. grade 9-5. house w 1. amhara 2. urban   | 0. no  | 1. iodized   | 1. yes | 38.5 | 8    | 0. no  |
| 5. college i 2. merchat 1. amhara 2. urban | 0. no  | 1. iodized   | 1. yes | 38.8 | 2    | 0. no  |
| 5. college i 1. governm 1. amhara 1. rural | 0. no  | 1. iodized   | 1. yes | 38.5 |      | 0. no  |

|                                             |        |                      |      |            |
|---------------------------------------------|--------|----------------------|------|------------|
| 3. grade 1-5. house w 1. amhara 2. urban    | 0. no  | 1. iodized 1. yes    | 38.5 | 0. no      |
| 4. grade 9-5. house w 1. amhara 2. urban    | 0. no  | 1. iodized 1. yes    | 35   | 13 1. yes  |
| 4. grade 9-5. house w 1. amhara 1. rural    | 0. no  | 0. non iodiz: 1. yes | 38.5 | 2 0. no    |
| 4. grade 9-2. merchat 1. amhara 2. urban    | 0. no  | 1. iodized 0. no     | 38.6 | 3.5 0. no  |
| 3. grade 1-1. governmε 1. amhara 1. rural   | 0. no  | 1. iodized 1. yes    | 38.5 | 4 0. no    |
| 3. grade 1-5. house w 1. amhara 1. rural    | 0. no  | 0. no                |      | 0. no      |
| 4. grade 9-5. house w 1. amhara 2. urban    | 0. no  | 1. iodized 1. yes    | 37   | 4 0. no    |
| 2. oly read 6. others 1. amhara 1. rural    | 0. no  | 0. non iodiz: 0. no  | 38.5 | 2 0. no    |
| 5. college ε 1. governmε 1. amhara 2. urban | 0. no  | 1. iodized 1. yes    | 37   | 1.3 0. no  |
| 4. grade 9-5. house w 1. amhara 2. urban    | 0. no  | 1. iodized 1. yes    | 39   | 0. no      |
| 2. oly read 5. house w 1. amhara 1. rural   | 0. no  | 1. iodized 1. yes    | 38.5 | 6 0. no    |
| 2. oly read 5. house w 1. amhara 1. rural   | 0. no  | 0. non iodiz: 0. no  | 38.5 | 2 0. no    |
| 2. oly read 2. merchat 1. amhara 2. urban   | 0. no  | 1. iodized 1. yes    | 40.5 | 3 0. no    |
| 5. college ε 5. house w 1. amhara 2. urban  | 0. no  | 0. non iodiz: 1. yes | 38.5 | 0. no      |
| 3. grade 1-2. merchat 2. oromo 2. urban     | 0. no  | 1. iodized 1. yes    | 39   | 2.5 0. no  |
| 5. college ε 1. governmε 1. amhara 2. urban | 0. no  | 0. no                |      | 0. no      |
| 3. grade 1-5. house w 1. amhara 1. rural    | 0. no  | 0. non iodiz: 0. no  | 38.5 | 0. no      |
| 5. college ε 1. governmε 1. amhara 2. urban | 0. no  | 1. iodized 0. no     | 40   | 2.6 0. no  |
| 3. grade 1-3. private ε 4. others 1. rural  | 1. yes | 1. iodized 0. no     | 41   | 40 0. no   |
| 5. college ε 1. governmε 1. amhara 2. urban | 0. no  | 1. iodized 1. yes    | 38   | 0. no      |
| 5. college ε 5. house w 1. amhara 2. urban  | 0. no  | 1. iodized 1. yes    | 38.5 | 3 0. no    |
| 4. grade 9-5. house w 1. amhara 2. urban    | 0. no  | 1. iodized 1. yes    | 38.5 | 8 0. no    |
| 3. grade 1-5. house w 1. amhara 2. urban    | 0. no  | 1. iodized 1. yes    | 38.5 | 3 0. no    |
| 5. college ε 5. house w 1. amhara 2. urban  | 0. no  | 1. iodized 0. no     | 38.8 | 0. no      |
| 4. grade 9-2. merchat 1. amhara 2. urban    | 0. no  | 1. iodized 0. no     | 38.6 | 3.5 0. no  |
| 3. grade 1-1. governmε 1. amhara 1. rural   | 0. no  | 1. iodized 1. yes    | 38.5 | 4 0. no    |
| 4. grade 9-5. house w 1. amhara 2. urban    | 0. no  | 1. iodized 1. yes    | 37   | 4 0. no    |
| 5. college ε 1. governmε 1. amhara 2. urban | 0. no  | 1. iodized 1. yes    | 38.5 | 2.75 0. no |
| 3. grade 1-3. private ε 4. others 1. rural  | 1. yes | 1. iodized 0. no     | 41   | 40 0. no   |
| 2. oly read 5. house w 1. amhara 1. rural   | 0. no  | 1. iodized 1. yes    | 39   | 2.5 0. no  |
| 5. college ε 1. governmε 1. amhara 2. urban | 0. no  | 1. iodized 1. yes    | 38.8 | 0.6 0. no  |
| 4. grade 9-5. house w 1. amhara 1. rural    | 0. no  | 0. non iodiz: 1. yes | 38.5 | 2 0. no    |
| 5. college ε 1. governmε 1. amhara 2. urban | 0. no  | 0. non iodiz: 1. yes | 38.5 | 0. no      |
| 3. grade 1-5. house w 1. amhara 1. rural    | 0. no  | 0. no                |      | 0. no      |
| 2. oly read 5. house w 1. amhara 1. rural   | 0. no  | 0. non iodiz: 0. no  | 38.5 | 2 0. no    |
| 5. college ε 1. governmε 1. amhara 2. urban | 0. no  | 1. iodized 1. yes    | 39   | 4 0. no    |
| 3. grade 1-5. house w 1. amhara 1. rural    | 1. yes | 1. iodized 1. yes    | 38.5 | 8 0. no    |
| 5. college ε 5. house w 1. amhara 2. urban  | 1. yes | 1. iodized 1. yes    | 38.5 | 3 1. yes   |
| 3. grade 1-5. house w 1. amhara 1. rural    | 1. yes | 0. non iodiz: 1. yes | 38.5 | 0. no      |
| 5. college ε 1. governmε 1. amhara 2. urban | 0. no  | 1. iodized 1. yes    | 38.8 | 0.6 0. no  |
| 4. grade 9-5. house w 1. amhara 2. urban    | 0. no  | 1. iodized 1. yes    | 38.5 | 8 0. no    |
| 5. college ε 2. merchat 1. amhara 2. urban  | 0. no  | 1. iodized 1. yes    | 38.8 | 2 0. no    |
| 5. college ε 1. governmε 1. amhara 2. urban | 0. no  | 1. iodized 0. no     | 38.5 | 0. no      |
| 5. college ε 5. house w 1. amhara 2. urban  | 0. no  | 1. iodized 0. no     | 38.8 | 0. no      |
| 5. college ε 1. governmε 1. amhara 1. rural | 0. no  | 1. iodized 1. yes    | 38.5 | 0. no      |
| 4. grade 9-5. house w 1. amhara 2. urban    | 0. no  | 1. iodized 1. yes    | 35   | 13 1. yes  |
| 4. grade 9-2. merchat 1. amhara 2. urban    | 0. no  | 1. iodized 0. no     | 38.6 | 3.5 0. no  |
| 2. oly read 5. house w 1. amhara 1. rural   | 0. no  | 1. iodized 1. yes    | 38.5 | 6 0. no    |
| 2. oly read 2. merchat 1. amhara 2. urban   | 0. no  | 1. iodized 1. yes    | 40.5 | 3 0. no    |
| 5. college ε 5. house w 1. amhara 2. urban  | 0. no  | 1. iodized 1. yes    | 40   | 0. no      |
| 5. college ε 1. governmε 1. amhara 2. urban | 0. no  | 1. iodized 1. yes    | 39   | 4 0. no    |
| 5. college ε 1. governmε 1. amhara 2. urban | 0. no  | 0. no                |      | 0. no      |



|                                            |        |              |        |      |            |
|--------------------------------------------|--------|--------------|--------|------|------------|
| 2. oly read 5. house w 1. amhara 2. urban  | 0. no  | 0. non iodiz | 1. yes | 44   | 3 1. yes   |
| 2. oly read 5. house w 1. amhara 1. rural  | 0. no  | 1. iodized   | 1. yes | 39   | 2.5 0. no  |
| 5. college i 5. house w 1. amhara 2. urban | 0. no  | 1. iodized   | 0. no  | 38.8 | 0. no      |
| 3. grade 1-5. house w 1. amhara 1. rural   | 1. yes | 1. iodized   | 1. yes | 38.5 | 8 0. no    |
| 2. oly read 5. house w 1. amhara 2. urban  | 0. no  | 0. non iodiz | 1. yes | 38.5 | 10 0. no   |
| 4. grade 9-5. house w 1. amhara 1. rural   | 0. no  | 0. non iodiz | 1. yes | 38.5 | 2 0. no    |
| 5. college i 1. governm 1. amhara 2. urban | 0. no  | 1. iodized   | 0. no  | 38.5 | 0. no      |
| 3. grade 1-5. house w 1. amhara 2. urban   | 0. no  | 1. iodized   | 1. yes | 38.5 | 3 0. no    |
| 3. grade 1-5. house w 1. amhara 2. urban   | 0. no  | 1. iodized   | 1. yes | 38.5 | 0. no      |
| 3. grade 1-2. merchat 1. amhara 2. urban   | 0. no  | 1. iodized   | 1. yes | 38.5 | 0. no      |
| 2. oly read 5. house w 1. amhara 1. rural  | 0. no  | 0. non iodiz | 0. no  | 38.5 | 2 0. no    |
| 3. grade 1-2. merchat 2. oromo 2. urban    | 0. no  | 1. iodized   | 1. yes | 39   | 2.5 0. no  |
| 2. oly read 5. house w 1. amhara 2. urban  | 0. no  | 0. non iodiz | 1. yes | 44   | 3 1. yes   |
| 2. oly read 5. house w 1. amhara 1. rural  | 0. no  | 1. iodized   | 1. yes | 39   | 2.5 0. no  |
| 5. college i 1. governm 1. amhara 2. urban | 0. no  | 1. iodized   | 1. yes | 40   | 0 0. no    |
| 4. grade 9-5. house w 1. amhara 2. urban   | 0. no  | 1. iodized   | 0. no  | 38.5 | 0. no      |
| 5. college i 2. merchat 1. amhara 2. urban | 0. no  | 1. iodized   | 1. yes | 38.8 | 2 0. no    |
| 3. grade 1-5. house w 1. amhara 1. rural   | 1. yes | 1. iodized   | 1. yes | 38.5 | 8 0. no    |
| 5. college i 1. governm 1. amhara 2. urban | 0. no  | 1. iodized   | 1. yes | 38.8 | 0.6 0. no  |
| 3. grade 1-5. house w 1. amhara 2. urban   | 0. no  | 1. iodized   | 1. yes | 38.5 | 3 0. no    |
| 4. grade 9-5. house w 1. amhara 2. urban   | 0. no  | 1. iodized   | 0. no  | 38.5 | 0. no      |
| 3. grade 1-5. house w 1. amhara 2. urban   | 0. no  | 1. iodized   | 1. yes | 38.5 | 0. no      |
| 5. college i 2. merchat 1. amhara 2. urban | 0. no  | 1. iodized   | 1. yes | 38.8 | 2 0. no    |
| 3. grade 1-2. merchat 1. amhara 2. urban   | 0. no  |              | 0. no  | 38.5 | 2 0. no    |
| 5. college i 1. governm 1. amhara 2. urban | 0. no  | 1. iodized   | 1. yes | 38.5 | 2.75 0. no |
| 3. grade 1-5. house w 1. amhara 1. rural   | 1. yes | 1. iodized   | 1. yes | 38.5 | 8 0. no    |
| 5. college i 5. house w 1. amhara 2. urban | 0. no  | 1. iodized   | 1. yes | 42   | 0 0. no    |
| 5. college i 1. governm 1. amhara 2. urban | 0. no  | 1. iodized   | 1. yes | 38.8 | 0.6 0. no  |
| 4. grade 9-2. merchat 1. amhara 2. urban   | 0. no  | 1. iodized   | 0. no  | 38.6 | 3.5 0. no  |
| 3. grade 1-2. merchat 2. oromo 2. urban    | 0. no  | 1. iodized   | 1. yes | 39   | 2.5 0. no  |
| 2. oly read 5. house w 1. amhara 2. urban  | 0. no  | 0. non iodiz | 1. yes | 44   | 3 1. yes   |
| 3. grade 1-2. merchat 1. amhara 2. urban   | 0. no  |              | 0. no  | 38.5 | 2 0. no    |
| 5. college i 5. house w 1. amhara 2. urban | 0. no  | 1. iodized   | 0. no  | 38.8 | 0. no      |
| 3. grade 1-5. house w 1. amhara 1. rural   | 0. no  | 0. non iodiz | 1. yes | 40   | 10 0. no   |
| 2. oly read 5. house w 1. amhara 2. urban  | 0. no  | 0. non iodiz | 1. yes | 38.5 | 10 0. no   |
| 5. college i 1. governm 1. amhara 2. urban | 0. no  | 1. iodized   | 1. yes | 40   | 0 0. no    |
| 5. college i 1. governm 1. amhara 2. urban | 0. no  | 1. iodized   | 1. yes | 38.8 | 0.6 0. no  |
| 4. grade 9-5. house w 1. amhara 2. urban   | 0. no  | 1. iodized   | 1. yes | 35   | 13 1. yes  |
| 4. grade 9-5. house w 1. amhara 2. urban   | 0. no  | 1. iodized   | 0. no  | 38.5 | 0. no      |
| 3. grade 1-2. merchat 1. amhara 2. urban   | 0. no  | 1. iodized   | 1. yes | 38.5 | 0. no      |
| 4. grade 9-5. house w 1. amhara 2. urban   | 0. no  | 1. iodized   | 0. no  | 38.5 | 0. no      |
| 4. grade 9-5. house w 1. amhara 2. urban   | 0. no  | 1. iodized   | 0. no  | 38.5 | 0. no      |
| 3. grade 1-5. house w 1. amhara 2. urban   | 0. no  | 1. iodized   | 1. yes | 38.5 | 3 0. no    |
| 5. college i 1. governm 1. amhara 2. urban | 0. no  | 1. iodized   | 0. no  | 40   | 2.6 0. no  |
| 5. college i 5. house w 1. amhara 2. urban | 1. yes | 1. iodized   | 1. yes | 38.5 | 3 1. yes   |
| 4. grade 9-5. house w 1. amhara 2. urban   | 0. no  | 1. iodized   | 0. no  | 38.5 | 0. no      |
| 3. grade 1-3. private 4. others 1. rural   | 1. yes | 1. iodized   | 0. no  | 41   | 40 0. no   |
| 3. grade 1-5. house w 1. amhara 2. urban   | 0. no  | 1. iodized   | 1. yes | 38.5 | 0. no      |
| 4. grade 9-5. house w 1. amhara 1. rural   | 0. no  | 1. iodized   | 1. yes | 42.8 | 0. no      |
| 2. oly read 5. house w 1. amhara 1. rural  | 0. no  | 1. iodized   | 1. yes | 39   | 2.5 0. no  |
| 5. college i 1. governm 1. amhara 2. urban | 0. no  | 1. iodized   | 1. yes | 40   | 0 0. no    |
| 4. grade 9-5. house w 2. oromo 2. urban    | 0. no  | 1. iodized   | 1. yes | 41   | 0. no      |

4. grade 9-5. house w 1. amhara 2. urban 0. no 1. iodized 1. yes 38.5 8 0. no

|        |        |        |        |        |        |        |        |        |        |
|--------|--------|--------|--------|--------|--------|--------|--------|--------|--------|
| 0. no  | 1. yes | 1. yes | 1. yes | 1. yes |        |        |        |        |        |
| 1. yes |        |        |        |        |        |        |        |        |        |
| 0. no  | 1. yes | 1. yes |        |        |        |        |        |        |        |
| 0. no  |        |        |        |        |        |        |        |        |        |
| 0. no  |        |        |        |        |        |        |        |        |        |
| 0. no  |        |        |        |        |        |        |        |        |        |
| 0. no  |        |        |        |        |        |        |        |        |        |
| 1. yes | 1. yes | 1. yes | 1. yes | 1. yes | 1. yes | 1. yes | 1. yes | 1. yes | 1. yes |
| 0. no  |        |        |        |        |        |        |        |        |        |
| 0. no  |        |        |        |        |        |        |        |        |        |
| 0. no  |        |        |        |        |        |        |        |        |        |
| 0. no  |        |        |        |        |        |        |        |        |        |
| 0. no  |        |        |        |        |        |        |        |        |        |
| 1. yes | 1. yes | 1. yes | 1. yes | 1. yes |        |        |        |        |        |
| 1. yes | 0. no  | 0. no  |        |        |        |        |        |        |        |
| 0. no  |        |        |        |        |        |        |        |        |        |
| 1. yes |        |        |        |        |        |        |        |        |        |
| 0. no  |        |        |        |        |        |        |        |        |        |
| 0. no  |        |        |        |        |        |        |        |        |        |
| 1. yes | 1. yes | 0. no  | 0. no  | 0. no  |        |        |        |        |        |
| 1. yes |        |        |        |        |        |        |        |        |        |
| 0. no  | 1. yes | 1. yes | 1. yes | 1. yes |        |        |        |        |        |
| 1. yes |        |        |        |        | 1. yes | 1. yes | 1. yes | 1. yes | 1. yes |
| 0. no  | 1. yes | 1. yes | 1. yes | 1. yes |        |        |        |        |        |
| 1. yes |        |        |        |        |        |        |        |        |        |
| 0. no  |        |        |        |        | 1. yes | 1. yes | 1. yes | 1. yes | 1. yes |
| 1. yes |        |        |        |        |        |        |        |        |        |
| 0. no  |        |        |        |        | 0. no  | 1. yes | 1. yes | 1. yes | 1. yes |
| 0. no  |        |        |        |        |        |        |        |        |        |
| 0. no  |        |        |        |        |        |        |        |        |        |
| 0. no  |        |        |        |        | 0. no  | 1. yes |        |        |        |
| 0. no  | 0. no  | 1. yes | 1. yes |        |        |        |        |        |        |
| 0. no  | 1. yes | 1. yes | 1. yes | 1. yes |        |        |        |        |        |
| 0. no  |        |        |        |        | 1. yes | 1. yes | 1. yes | 1. yes | 1. yes |
| 1. yes |        |        |        |        |        |        |        |        |        |
| 0. no  |        |        |        |        |        |        |        |        |        |
| 0. no  |        |        |        |        |        |        |        |        |        |
| 0. no  |        |        |        |        |        |        |        |        |        |
| 0. no  | 1. yes | 1. yes |        |        |        |        |        |        |        |
| 0. no  |        |        |        |        |        |        |        |        |        |
| 0. no  |        |        |        |        |        |        |        |        |        |
| 1. yes |        |        |        |        |        |        |        |        |        |
| 1. yes |        |        |        |        | 1. yes | 1. yes | 1. yes | 1. yes | 1. yes |
| 0. no  |        |        |        |        | 1. yes | 1. yes | 0. no  | 0. no  | 0. no  |
| 0. no  |        |        |        |        |        |        |        |        |        |
|        | 1. yes | 1. yes | 1. yes | 1. yes |        |        |        |        |        |
| 0. no  |        |        |        |        |        |        |        |        |        |
| 0. no  |        |        |        |        |        |        |        |        |        |
| 0. no  |        |        |        |        |        |        |        |        |        |
| 1. yes | 1. yes | 1. yes | 1. yes | 1. yes |        |        |        |        |        |



|        |        |        |        |        |        |        |        |        |        |        |
|--------|--------|--------|--------|--------|--------|--------|--------|--------|--------|--------|
| 0. no  |        |        |        |        |        |        |        |        |        |        |
| 0. no  |        |        |        |        |        |        |        |        |        |        |
| 0. no  | 1. yes | 1. yes | 1. yes | 1. yes |        |        |        |        |        |        |
| 0. no  |        |        |        |        |        |        |        |        |        |        |
| 0. no  | 1. yes | 1. yes | 1. yes | 1. yes |        |        |        |        |        |        |
| 1. yes |        |        |        |        |        |        |        |        |        |        |
| 0. no  | 1. yes | 1. yes |        |        |        |        |        |        |        |        |
| 0. no  |        |        |        |        |        |        |        |        |        |        |
| 0. no  |        |        |        |        |        |        |        |        |        |        |
| 0. no  |        |        |        |        |        |        |        |        |        |        |
| 0. no  |        |        |        |        |        |        |        |        |        |        |
| 0. no  |        |        |        |        |        |        |        |        |        |        |
| 1. yes | 1. yes | 1. yes | 1. yes | 1. yes |        |        |        |        |        |        |
| 1. yes | 0. no  | 0. no  |        |        |        |        |        |        |        |        |
| 0. no  |        |        |        |        |        |        |        |        |        |        |
| 1. yes |        |        |        |        |        |        |        |        |        |        |
| 1. yes | 1. yes | 0. no  | 0. no  | 0. no  |        |        |        |        |        |        |
| 1. yes |        |        |        |        | 1. yes | 1. yes | 1. yes | 1. yes | 1. yes | 1. yes |
| 0. no  | 1. yes | 1. yes | 1. yes | 1. yes |        |        |        |        |        |        |
| 1. yes |        |        |        |        |        |        |        |        |        |        |
| 0. no  |        |        |        |        |        |        |        |        |        |        |
| 0. no  |        |        |        |        | 0. no  | 1. yes |        |        |        |        |
| 0. no  | 0. no  | 1. yes | 1. yes |        |        |        |        |        |        |        |
| 0. no  |        |        |        |        | 1. yes | 1. yes | 1. yes | 1. yes | 1. yes | 1. yes |
| 0. no  |        |        |        |        |        |        |        |        |        |        |
| 0. no  |        |        |        |        |        |        |        |        |        |        |
| 0. no  |        |        |        |        |        |        |        |        |        |        |
| 0. no  |        |        |        |        |        |        |        |        |        |        |
| 0. no  |        |        |        |        |        |        |        |        |        |        |
| 1. yes |        |        |        |        |        |        |        |        |        |        |
| 1. yes |        |        |        |        | 1. yes | 1. yes | 1. yes | 1. yes | 1. yes | 1. yes |
| 0. no  |        |        |        |        |        |        |        |        |        |        |
| 1. yes | 1. yes | 1. yes | 1. yes | 1. yes |        |        |        |        |        |        |
| 0. no  | 1. yes | 1. yes | 1. yes | 1. yes |        |        |        |        |        |        |
| 0. no  |        |        |        |        |        |        |        |        |        |        |
| 0. no  | 1. yes | 1. yes |        |        |        |        |        |        |        |        |
| 1. yes | 0. no  | 0. no  |        |        |        |        |        |        |        |        |





1. yes

1. yes

0. no

1. yes

0. no

1. yes

0. no

1. yes

0. no

0. no

0. no

1. yes

1. yes

1. yes

1. yes

0. no

1. yes

1. yes

1. yes

0. no

0. no

0. no

1. yes

1. yes

0. no

0. no

0. no

1. yes

1. yes

1. yes

0. no

1. yes

0. no

1. yes

1. yes

1. yes

1. yes

0. no

0. no

0. no

1. yes

0. no

1. yes

1. yes

1. yes

1. yes

1. yes

0. no

0. no

0. no

1. yes

0. no

0. no

0. no

1. yes

1. yes

1. yes

1. yes

0. no

1. yes

0. no

0. no

0. no

1. yes

1. yes

0. no

1. yes

0. no

0. no

0. no

0. no

1. yes

1. yes

1. yes

1. yes

0. no

0. no

0. no



|        |        |        |        |        |        |        |        |        |        |
|--------|--------|--------|--------|--------|--------|--------|--------|--------|--------|
| 1. yes | 1. yes | 1. yes | 1. yes | 1. yes |        |        |        |        |        |
| 1. yes | 0. no  | 0. no  |        |        |        |        |        |        |        |
| 0. no  |        |        |        |        |        |        |        |        |        |
| 1. yes | 1. yes | 0. no  | 0. no  | 0. no  |        |        |        |        |        |
| 1. yes |        |        |        |        |        |        |        |        |        |
|        |        |        |        |        | 1. yes | 1. yes | 1. yes | 1. yes | 1. yes |
| 1. yes |        |        |        |        | 0. no  | 1. yes | 1. yes | 1. yes | 1. yes |
| 1. yes |        |        |        |        | 1. yes |        |        |        |        |
| 0. no  |        |        |        |        |        |        |        |        |        |
| 0. no  |        |        |        |        |        |        |        |        |        |
| 0. no  |        |        |        |        |        |        |        |        |        |
| 1. yes |        |        |        |        | 1. yes | 1. yes | 1. yes | 1. yes | 1. yes |
| 0. no  | 1. yes | 1. yes | 1. yes | 1. yes |        |        |        |        |        |
| 0. no  |        |        |        |        |        |        |        |        |        |
|        | 0. no  | 0. no  | 0. no  | 0. no  |        |        |        |        |        |
| 0. no  |        |        |        |        |        |        |        |        |        |
| 0. no  | 0. no  |        |        |        |        |        |        |        |        |
| 0. no  |        |        |        |        |        |        |        |        |        |
| 0. no  |        |        |        |        | 1. yes | 1. yes | 1. yes | 1. yes | 1. yes |
| 0. no  |        |        |        |        |        |        |        |        |        |
| 0. no  |        |        |        |        |        |        |        |        |        |
| 0. no  |        |        |        |        |        |        |        |        |        |
| 0. no  |        |        |        |        |        |        |        |        |        |
| 0. no  |        |        |        |        |        |        |        |        |        |
| 1. yes | 1. yes | 0. no  | 0. no  | 0. no  |        |        |        |        |        |
| 1. yes |        |        |        |        | 1. yes | 1. yes | 1. yes | 1. yes | 1. yes |
| 1. yes |        |        |        |        |        |        |        |        |        |
| 0. no  | 0. no  |        |        |        |        |        |        |        |        |
| 0. no  |        |        |        |        |        |        |        |        |        |
| 0. no  | 1. yes | 1. yes |        |        |        |        |        |        |        |
| 0. no  |        |        |        |        |        |        |        |        |        |
| 0. no  |        |        |        |        |        |        |        |        |        |
| 1. yes |        |        |        |        | 1. yes | 1. yes | 1. yes | 1. yes | 1. yes |
| 0. no  | 1. yes | 1. yes | 1. yes | 1. yes |        |        |        |        |        |
| 0. no  |        |        |        |        |        |        |        |        |        |
| 0. no  |        |        |        |        |        |        |        |        |        |
| 0. no  |        |        |        |        |        |        |        |        |        |
| 0. no  |        |        |        |        |        |        |        |        |        |
| 0. no  |        |        |        |        |        |        |        |        |        |
| 1. yes | 0. no  | 0. no  |        |        |        |        |        |        |        |
| 1. yes | 1. yes | 0. no  | 0. no  | 0. no  |        |        |        |        |        |
| 0. no  |        |        |        |        |        |        |        |        |        |
| 0. no  |        |        |        |        |        |        |        |        |        |
| 0. no  |        |        |        |        |        |        |        |        |        |
| 0. no  |        |        |        |        |        |        |        |        |        |
| 0. no  |        |        |        |        |        |        |        |        |        |
| 1. yes | 1. yes | 1. yes | 1. yes | 1. yes |        |        |        |        |        |

|        |        |        |        |        |        |        |        |        |        |
|--------|--------|--------|--------|--------|--------|--------|--------|--------|--------|
| 0. no  |        |        |        |        |        |        |        |        |        |
| 0. no  |        |        |        |        |        |        |        |        |        |
| 0. no  |        |        |        |        |        |        |        |        |        |
| 0. no  |        |        |        |        |        |        |        |        |        |
| 1. yes |        |        |        |        |        |        |        |        |        |
| 0. no  |        |        |        |        |        |        |        |        |        |
| 0. no  |        |        |        |        |        |        |        |        |        |
| 0. no  |        |        |        |        |        |        |        |        |        |
| 1. yes | 1. yes | 1. yes | 1. yes | 1. yes |        |        |        |        |        |
| 1. yes |        |        |        |        |        |        |        |        |        |
| 1. yes |        |        |        |        | 1. yes | 1. yes | 1. yes | 1. yes | 1. yes |
| 0. no  |        |        |        |        |        |        |        |        |        |
| 0. no  |        |        |        |        |        |        |        |        |        |
| 0. no  |        |        |        |        |        |        |        |        |        |
| 0. no  |        |        |        |        |        |        |        |        |        |
| 1. yes |        |        |        |        |        |        |        |        |        |
| 0. no  |        |        |        |        |        |        |        |        |        |
| 0. no  |        |        |        |        |        |        |        |        |        |
| 0. no  |        |        |        |        |        |        |        |        |        |
| 0. no  |        |        |        |        |        |        |        |        |        |
| 1. yes |        |        |        |        |        |        |        |        |        |
| 0. no  |        |        |        |        |        |        |        |        |        |
| 0. no  | 1. yes | 1. yes |        |        |        |        |        |        |        |
| 0. no  |        |        |        |        |        |        |        |        |        |
| 1. yes |        |        |        |        |        |        |        |        |        |
| 1. yes |        |        |        |        |        |        |        |        |        |
| 0. no  |        |        |        |        |        |        |        |        |        |
| 0. no  |        |        |        |        |        |        |        |        |        |
| 0. no  |        |        |        |        |        |        |        |        |        |
| 0. no  |        |        |        |        |        |        |        |        |        |
| 0. no  | 0. no  | 1. yes | 1. yes |        |        |        |        |        |        |
| 0. no  | 1. yes | 1. yes |        |        |        |        |        |        |        |
| 1. yes | 1. yes | 0. no  | 0. no  | 0. no  |        |        |        |        |        |
| 0. no  |        |        |        |        |        |        |        |        |        |
| 0. no  |        |        |        |        |        |        |        |        |        |
| 0. no  |        |        |        |        |        |        |        |        |        |
| 0. no  |        |        |        |        |        |        |        |        |        |
| 1. yes |        |        |        |        |        |        |        |        |        |
| 0. no  |        |        |        |        |        |        |        |        |        |
| 0. no  | 1. yes | 1. yes |        |        |        |        |        |        |        |
| 0. no  |        |        |        |        |        |        |        |        |        |
| 1. yes |        |        |        |        |        |        |        |        |        |
| 1. yes |        |        |        |        |        |        |        |        |        |
| 1. yes |        |        |        |        |        |        |        |        |        |
| 1. yes |        |        |        |        |        |        |        |        |        |
| 0. no  |        |        |        |        |        |        |        |        |        |
| 0. no  |        |        |        |        |        |        |        |        |        |
| 0. no  | 1. yes | 1. yes | 1. yes | 1. yes |        |        |        |        |        |
| 1. yes |        |        |        |        |        |        |        |        |        |
| 0. no  | 0. no  |        |        |        |        |        |        |        |        |
| 1. yes | 1. yes | 1. yes | 1. yes | 1. yes |        |        |        |        |        |
| 0. no  | 1. yes | 1. yes | 1. yes | 1. yes |        |        |        |        |        |
| 0. no  |        |        |        |        |        |        |        |        |        |
| 0. no  |        |        |        |        |        |        |        |        |        |
| 0. no  | 1. yes | 1. yes | 1. yes | 1. yes |        |        |        |        |        |

0. no

1. yes    1. yes    1. yes

0. no    0. no    1. yes    0. no  
1. yes    1. yes

1. yes    1. yes    1. yes    0. no    1. yes  
  
1. yes    1. yes    1. yes  
1. yes    1. yes    1. yes

1. yes    1. yes

1. yes    1. yes    1. yes

1. yes

1. yes    1. yes    1. yes    1. yes  
1. yes    1. yes    1. yes

1. yes    1. yes    1. yes    1. yes

1. yes    0. no    0. no    0. no

1. yes    0. no  
1. yes

1. yes    1. yes    1. yes    1. yes    1. yes

|        |        |        |  |        |                  |                  |                  |                  |
|--------|--------|--------|--|--------|------------------|------------------|------------------|------------------|
|        |        |        |  |        | 0. no            | 1. yes           | 1. yes           | 0. no            |
|        |        |        |  | 1. yes | 1. yes           | 1. yes           | 1. yes           | 1. yes           |
|        |        |        |  | 1. yes | 1. yes<br>1. yes | 1. yes<br>1. yes | 0. no<br>1. yes  | 0. no<br>0. no   |
| 1. yes | 1. yes | 1. yes |  |        | 1. yes           | 1. yes           | 1. yes           | 1. yes           |
|        |        |        |  | 0. no  | 0. no            | 0. no            | 1. yes           | 1. yes           |
|        |        |        |  | 1. yes | 1. yes           |                  |                  |                  |
| 1. yes | 1. yes |        |  |        |                  |                  |                  |                  |
| 1. yes |        |        |  |        | 1. yes           | 1. yes           | 1. yes           |                  |
|        |        |        |  | 1. yes | 1. yes           | 1. yes           | 1. yes           | 1. yes           |
|        |        |        |  |        | 1. yes           | 1. yes           | 1. yes           | 1. yes           |
|        |        |        |  |        |                  | 1. yes<br>1. yes | 1. yes<br>1. yes | 1. yes<br>1. yes |
| 1. yes | 1. yes |        |  |        |                  |                  |                  |                  |
| 1. yes | 0. no  |        |  |        |                  |                  |                  |                  |
|        |        |        |  | 1. yes | 1. yes           | 1. yes           | 0. no            | 0. no            |

1. yes 1. yes 1. yes 1. yes

0. no 0. no 1. yes 0. no  
1. yes 1. yes

1. yes 1. yes

1. yes 1. yes 1. yes

1. yes 1. yes 1. yes 1. yes

1. yes 0. no 0. no 0. no

1. yes 0. no

1. yes 1. yes 1. yes 1. yes 1. yes

1. yes 1. yes 1. yes 0. no  
1. yes 1. yes 1. yes 1. yes

1. yes 1. yes 1. yes

0. no 0. no 0. no 1. yes 1. yes  
1. yes 1. yes

1. yes 1. yes 1. yes 1. yes

1. yes 1. yes 1. yes

0. no 0. no 1. yes 0. no  
1. yes 1. yes 1. yes 0. no  
1. yes 1. yes 1. yes 1. yes

1. yes 0. no  
1. yes

1. yes 1. yes 1. yes 1. yes 1. yes

0. no 1. yes 1. yes 0. no

1. yes 1. yes 1. yes 1. yes 1. yes  
1. yes 1. yes 1. yes 0. no  
1. yes 1. yes 1. yes 1. yes

1. yes 1. yes

1. yes 1. yes

1. yes 1. yes 1. yes

1. yes 1. yes 1. yes 1. yes

1. yes 1. yes

1. yes 1. yes 1. yes

1. yes 1. yes 1. yes 1. yes

1. yes 0. no

1. yes 1. yes 1. yes 1. yes 1. yes

0. no 0. no 0. no 1. yes 1. yes

1. yes 1. yes 1. yes 1. yes 1. yes  
1. yes 1. yes 1. yes 1. yes 1. yes

1. yes 1. yes

1. yes 1. yes 1. yes 1. yes 1. yes  
1. yes 1. yes 1. yes

1. yes 0. no

1. yes 1. yes 1. yes

1. yes 0. no

1. yes 1. yes 1. yes 1. yes  
1. yes 1. yes 1. yes 0. no 1. yes

0. no 1. yes 1. yes 0. no

1. yes 1. yes 1. yes 0. no

1. yes 1. yes 1. yes 1. yes



1. yes 1. yes 1. yes 1. yes  
1. yes 1. yes 1. yes 1. yes  
1. yes 1. yes 1. yes 1. yes

1. yes 1. yes 1. yes 0. no

1. yes 1. yes 1. yes 0. no  
1. yes 1. yes 1. yes 1. yes

1. yes 1. yes

1. yes 1. yes

1. yes 0. no

1. yes 1. yes 1. yes 1. yes 1. yes  
1. yes 1. yes 1. yes 1. yes 1. yes

1. yes 1. yes

1. yes 1. yes 1. yes 1. yes 1. yes

1. yes 1. yes 1. yes

1. yes 1. yes

1. yes

1. yes 0. no

0. no 1. yes 1. yes 0. no

1. yes 1. yes 1. yes 1. yes 1. yes

1. yes 1. yes 1. yes

1. yes 1. yes 1. yes 0. no 0. no

1. yes 1. yes

1. yes 1. yes

1. yes 1. yes 1. yes 1. yes 1. yes

1. yes 1. yes 1. yes 1. yes

1. yes 1. yes 1. yes

1. yes 1. yes 1. yes

1. yes 0. no

0. no 0. no 1. yes 0. no

1. yes 1. yes 1. yes 0. no  
1. yes 1. yes 1. yes 1. yes

0. no 0. no 1. yes 1. yes 1. yes  
1. yes 1. yes 1. yes 0. no 1. yes

1. yes 0. no

0. no 1. yes 1. yes 0. no  
1. yes 1. yes 1. yes 0. no  
1. yes 1. yes 1. yes 1. yes  
1. yes 1. yes 1. yes 1. yes

1. yes 1. yes  
0. no 0. no 0. no 1. yes 1. yes  
1. yes 1. yes 1. yes 1. yes 1. yes  
1. yes 1. yes 1. yes 1. yes 1. yes

0. no 1. yes 1. yes 0. no  
1. yes 1. yes 1. yes 0. no  
1. yes 1. yes 1. yes 1. yes

1. yes 1. yes 1. yes

1. yes 1. yes 1. yes 1. yes 1. yes  
1. yes 1. yes 1. yes 1. yes 1. yes

1. yes 1. yes 1. yes 1. yes  
1. yes 1. yes 1. yes 1. yes







|        |        |        |        |        |        |        |        |        |                                                                                     |
|--------|--------|--------|--------|--------|--------|--------|--------|--------|-------------------------------------------------------------------------------------|
|        |        | 1. yes | 1. yes | 1. yes | 1. yes |        |        |        | 36-47 motl<br>48-59 motl<br>less tha 12<br>24-35 motl<br>less tha 12                |
| 1. yes | 1. yes |        |        |        |        | 1. yes | 1. yes | 1. yes |                                                                                     |
|        |        | 1. yes | 1. yes | 1. yes |        |        |        |        | 36-47 motl<br>less tha 12                                                           |
|        |        | 1. yes | 1. yes | 1. yes | 1. yes |        |        |        | 48-59 motl<br>48-59 motl<br>24-35 motl<br>24-35 motl                                |
|        |        |        |        |        |        | 1. yes | 1. yes | 1. yes | 48-59 motl<br>48-59 motl<br>less tha 12<br>less tha 12                              |
|        |        |        |        |        |        | 1. yes | 1. yes | 1. yes | 36-47 motl<br>36-47 motl<br>less tha 12<br>12-23 motl<br>less tha 12                |
|        |        | 1. yes | 1. yes | 1. yes | 1. yes |        |        |        | 48-59 motl<br>24-35 motl<br>12-23 motl<br>12-23 motl<br>12-23 motl                  |
|        |        | 0. no  | 0. no  | 0. no  | 0. no  |        |        |        | 48-59 motl<br>24-35 motl<br>12-23 motl<br>12-23 motl<br>12-23 motl                  |
|        |        |        |        |        |        | 0. no  | 0. no  | 0. no  | 48-59 motl<br>24-35 motl<br>12-23 motl<br>12-23 motl<br>12-23 motl                  |
|        |        |        |        |        |        | 1. yes | 1. yes | 1. yes | 48-59 motl<br>24-35 motl<br>36-47 motl<br>24-35 motl<br>12-23 motl                  |
| 0. no  | 0. no  | 1. yes | 1. yes | 1. yes | 1. yes |        |        |        | 36-47 motl<br>24-35 motl<br>36-47 motl<br>12-23 motl<br>36-47 motl                  |
|        |        | 1. yes | 1. yes | 1. yes | 1. yes |        |        |        | 48-59 motl<br>less tha 12<br>less tha 12<br>36-47 motl<br>24-35 motl<br>less tha 12 |
|        |        | 1. yes | 0. no  | 0. no  | 0. no  | 1. yes | 1. yes | 1. yes | 24-35 motl<br>24-35 motl<br>12-23 motl<br>24-35 motl<br>24-35 motl                  |
| 1. yes | 1. yes |        |        |        |        |        |        |        | 48-59 motl<br>36-47 motl<br>48-59 motl<br>48-59 motl<br>less tha 12<br>less tha 12  |
| 0. no  | 0. no  |        |        |        |        | 1. yes | 1. yes | 1. yes | 24-35 motl<br>24-35 motl<br>12-23 motl<br>24-35 motl<br>24-35 motl                  |
| 1. yes | 1. yes |        |        |        |        |        |        |        | 48-59 motl<br>36-47 motl<br>48-59 motl<br>48-59 motl<br>less tha 12<br>less tha 12  |
|        |        | 1. yes | 1. yes | 1. yes | 1. yes |        |        |        | 24-35 motl<br>less tha 12<br>less tha 12                                            |
| 1. yes | 1. yes |        |        |        |        | 1. yes | 1. yes | 1. yes | 24-35 motl<br>less tha 12<br>less tha 12                                            |

|        |        |        |        |        |        |        |        |        |             |
|--------|--------|--------|--------|--------|--------|--------|--------|--------|-------------|
| 1. yes | 1. yes | 0. no  | 0. no  | 0. no  | 0. no  |        |        |        | 36-47 motf  |
|        |        |        |        |        |        | 1. yes | 1. yes | 1. yes | 24-35 motf  |
|        |        |        |        |        |        |        |        |        | 48-59 motf  |
| 1. yes |        |        |        |        |        |        |        |        | 24-35 motf  |
|        |        |        |        |        |        |        |        |        | 24-35 motf  |
|        |        |        |        |        |        |        |        |        | 24-35 motf  |
|        |        |        |        |        |        |        |        |        | less tha 12 |
|        |        |        |        |        |        |        |        |        | less tha 12 |
|        |        |        |        |        |        | 1. yes | 1. yes | 1. yes | 36-47 motf  |
|        |        |        |        |        |        | 1. yes | 1. yes | 1. yes | 48-59 motf  |
|        |        | 1. yes | 1. yes | 1. yes | 1. yes |        |        |        | 48-59 motf  |
|        |        |        |        |        |        |        |        |        | 36-47 motf  |
| 1. yes | 1. yes |        |        |        |        |        |        |        | 12-23 motf  |
|        |        |        |        |        |        |        |        |        | 12-23 motf  |
|        |        |        |        |        |        |        |        |        | less tha 12 |
|        |        |        |        |        |        | 1. yes | 1. yes | 1. yes | 24-35 motf  |
| 0. no  | 0. no  |        |        |        |        |        |        |        | 48-59 motf  |
|        |        | 1. yes | 1. yes | 1. yes | 1. yes |        |        |        | less tha 12 |
|        |        |        |        |        |        |        |        |        | 36-47 motf  |
| 1. yes | 1. yes |        |        |        |        |        |        |        | 36-47 motf  |
| 0. no  | 0. no  |        |        |        |        |        |        |        | less tha 12 |
| 1. yes | 1. yes |        |        |        |        |        |        |        | 24-35 motf  |
| 0. no  | 0. no  |        |        |        |        |        |        |        | 24-35 motf  |
| 1. yes | 1. yes |        |        |        |        |        |        |        | 24-35 motf  |
|        |        | 1. yes | 1. yes | 1. yes | 1. yes |        |        |        | less tha 12 |
|        |        |        |        |        |        |        |        |        | 48-59 motf  |
|        |        |        |        |        |        |        |        |        | 24-35 motf  |
|        |        |        |        |        |        |        |        |        | 12-23 motf  |
|        |        |        |        |        |        |        |        |        | 24-35 motf  |
|        |        |        |        |        |        |        |        |        | less tha 12 |
| 1. yes | 1. yes |        |        |        |        | 1. yes | 1. yes | 1. yes | 36-47 motf  |
|        |        |        |        |        |        |        |        |        | less tha 12 |
|        |        |        |        |        |        |        |        |        | 24-35 motf  |
|        |        |        |        |        |        |        |        |        | 48-59 motf  |
|        |        |        |        |        |        |        |        |        | 12-23 motf  |
|        |        |        |        |        |        |        |        |        | 36-47 motf  |
|        |        |        |        |        |        |        |        |        | less tha 12 |
|        |        |        |        |        |        | 1. yes | 1. yes | 1. yes | 48-59 motf  |
|        |        |        |        |        |        |        |        |        | 24-35 motf  |
|        |        |        |        |        |        |        |        |        | 36-47 motf  |
|        |        |        |        |        |        |        |        |        | 24-35 motf  |
|        |        |        |        |        |        |        |        |        | 12-23 motf  |
|        |        |        |        |        |        |        |        |        | 24-35 motf  |
| 1. yes | 1. yes |        |        |        |        |        |        |        | 36-47 motf  |
|        |        |        |        |        |        |        |        |        | 12-23 motf  |
|        |        |        |        |        |        |        |        |        | less tha 12 |
| 1. yes | 1. yes |        |        |        |        |        |        |        | 24-35 motf  |
|        |        | 1. yes | 1. yes | 1. yes | 1. yes |        |        |        | 36-47 motf  |
|        |        |        |        |        |        | 1. yes | 1. yes | 1. yes | 48-59 motf  |



|        |        |        |        |        |        |        |        |        |                           |
|--------|--------|--------|--------|--------|--------|--------|--------|--------|---------------------------|
|        |        |        |        |        |        | 1. yes | 1. yes | 1. yes | 48-59 motf<br>less tha 12 |
|        |        | 1. yes | 1. yes | 1. yes | 1. yes |        |        |        | 36-47 motf<br>less tha 12 |
|        |        |        |        |        |        | 0. no  | 0. no  | 0. no  | 48-59 motf<br>less tha 12 |
| 1. yes | 1. yes |        |        |        |        | 1. yes | 1. yes | 1. yes | 24-35 motf<br>48-59 motf  |
|        |        |        |        |        |        |        |        |        | 24-35 motf<br>less tha 12 |
|        |        |        |        |        |        | 1. yes | 1. yes | 1. yes | 36-47 motf<br>less tha 12 |
|        |        | 1. yes | 1. yes | 1. yes | 1. yes | 1. yes | 1. yes | 1. yes | 48-59 motf<br>48-59 motf  |
|        |        |        |        |        |        | 1. yes | 1. yes | 1. yes | 36-47 motf<br>48-59 motf  |
| 1. yes | 1. yes | 1. yes | 1. yes | 1. yes | 1. yes |        |        |        | less tha 12<br>12-23 motf |
| 1. yes | 1. yes |        |        |        |        | 1. yes | 1. yes | 1. yes | 36-47 motf<br>24-35 motf  |
|        |        |        |        |        |        |        |        |        | 48-59 motf<br>24-35 motf  |
|        |        | 1. yes | 1. yes | 1. yes | 1. yes |        |        |        | less tha 12<br>12-23 motf |
|        |        | 1. yes | 1. yes | 1. yes | 1. yes |        |        |        | 36-47 motf<br>less tha 12 |
|        |        | 1. yes | 1. yes | 1. yes | 1. yes |        |        |        | 36-47 motf<br>36-47 motf  |
|        |        |        |        |        |        |        |        |        | 24-35 motf<br>12-23 motf  |
|        |        | 1. yes | 1. yes | 1. yes | 1. yes | 1. yes | 1. yes | 1. yes | 48-59 motf<br>36-47 motf  |
|        |        | 1. yes | 1. yes | 1. yes | 1. yes |        |        |        | 36-47 motf<br>12-23 motf  |
| 1. yes | 1. yes |        |        |        |        | 1. yes | 1. yes | 1. yes | 48-59 motf<br>48-59 motf  |
|        |        |        |        |        |        |        |        |        | 24-35 motf<br>less tha 12 |
| 1. yes |        |        |        |        |        |        |        |        | less tha 12<br>24-35 motf |
|        |        |        |        |        |        |        |        |        | 24-35 motf<br>less tha 12 |
|        |        | 1. yes | 1. yes | 1. yes | 1. yes | 1. yes | 1. yes | 1. yes | 48-59 motf<br>36-47 motf  |
| 0. no  | 0. no  | 1. yes | 1. yes | 1. yes | 1. yes |        |        |        | 36-47 motf<br>36-47 motf  |
|        |        | 1. yes | 1. yes | 1. yes | 1. yes |        |        |        | less tha 12<br>24-35 motf |
| 0. no  | 0. no  |        |        |        |        | 1. yes | 1. yes | 1. yes | 48-59 motf<br>24-35 motf  |
|        |        |        |        |        |        | 1. yes | 1. yes | 1. yes | 48-59 motf<br>36-47 motf  |
|        |        | 1. yes | 1. yes | 1. yes | 1. yes |        |        |        | 48-59 motf<br>36-47 motf  |

|        |        |        |        |        |        |        |        |        |             |
|--------|--------|--------|--------|--------|--------|--------|--------|--------|-------------|
|        |        | 0. no  | 0. no  | 0. no  | 0. no  |        |        |        | 36-47 motf  |
|        |        |        |        |        |        | 1. yes | 1. yes | 1. yes | 36-47 motf  |
| 1. yes | 1. yes |        |        |        |        |        |        |        | 48-59 motf  |
|        |        | 1. yes | 1. yes | 1. yes | 1. yes |        |        |        | less tha 12 |
|        |        |        |        |        |        |        |        |        | 24-35 motf  |
|        |        |        |        |        |        |        |        |        | 48-59 motf  |
|        |        |        |        |        |        |        |        |        | 24-35 motf  |
|        |        |        |        |        |        |        |        |        | 24-35 motf  |
| 1. yes | 1. yes |        |        |        |        | 1. yes | 1. yes | 1. yes | 48-59 motf  |
|        |        |        |        |        |        |        |        |        | 24-35 motf  |
|        |        | 1. yes | 1. yes | 1. yes | 1. yes |        |        |        | 12-23 motf  |
|        |        |        |        |        |        |        |        |        | 48-59 motf  |
|        |        |        |        |        |        |        |        |        | 36-47 motf  |
|        |        |        |        |        |        |        |        |        | less tha 12 |
|        |        |        |        |        |        |        |        |        | less tha 12 |
|        |        | 1. yes | 1. yes | 1. yes | 1. yes |        |        |        | less tha 12 |
|        |        |        |        |        |        |        |        |        | 36-47 motf  |
|        |        |        |        |        |        |        |        |        | less tha 12 |
| 0. no  | 0. no  | 1. yes | 1. yes | 1. yes | 1. yes | 0. no  | 0. no  | 0. no  | 48-59 motf  |
|        |        |        |        |        |        |        |        |        | 36-47 motf  |
|        |        |        |        |        |        | 1. yes | 1. yes | 1. yes | 24-35 motf  |
|        |        |        |        |        |        |        |        |        | 48-59 motf  |
|        |        |        |        |        |        |        |        |        | less tha 12 |
|        |        |        |        |        |        | 1. yes | 1. yes | 1. yes | 36-47 motf  |
|        |        |        |        |        |        |        |        |        | 48-59 motf  |
| 0. no  | 0. no  |        |        |        |        |        |        |        | less tha 12 |
| 1. yes | 1. yes |        |        |        |        |        |        |        | 24-35 motf  |
|        |        | 1. yes | 1. yes | 1. yes | 1. yes |        |        |        | 24-35 motf  |
|        |        |        |        |        |        |        |        |        | 48-59 motf  |
|        |        |        |        |        |        |        |        |        | 12-23 motf  |
|        |        |        |        |        |        |        |        |        | less tha 12 |
|        |        | 1. yes | 1. yes | 1. yes | 1. yes |        |        |        | 36-47 motf  |
|        |        |        |        |        |        |        |        |        | 24-35 motf  |
|        |        |        |        |        |        |        |        |        | 12-23 motf  |
|        |        |        |        |        |        |        |        |        | 12-23 motf  |
| 1. yes | 1. yes |        |        |        |        |        |        |        | 24-35 motf  |
| 1. yes | 1. yes |        |        |        |        |        |        |        | 24-35 motf  |
|        |        |        |        |        |        |        |        |        | less tha 12 |
|        |        |        |        |        |        | 1. yes | 1. yes | 1. yes | 48-59 motf  |
|        |        |        |        |        |        |        |        |        | less tha 12 |
|        |        |        |        |        |        |        |        |        | 12-23 motf  |
|        |        | 1. yes | 1. yes | 1. yes | 1. yes |        |        |        | 36-47 motf  |
| 1. yes | 1. yes |        |        |        |        |        |        |        | 24-35 motf  |
|        |        |        |        |        |        | 1. yes | 1. yes | 1. yes | 48-59 motf  |
|        |        |        |        |        |        |        |        |        | 12-23 motf  |
|        |        |        |        |        |        |        |        |        | less tha 12 |
|        |        |        |        |        |        |        |        |        | less tha 12 |
|        |        | 1. yes | 1. yes | 1. yes | 1. yes |        |        |        | 48-59 motf  |
|        |        |        |        |        |        | 1. yes | 1. yes | 1. yes | 48-59 motf  |





1. yes    1. yes    1. yes    1. yes

48-59 motl

|    |   |     |   |   |  |   |          |          |      |
|----|---|-----|---|---|--|---|----------|----------|------|
| 4  | 1 |     |   |   |  | 1 |          |          |      |
| 3  |   |     |   | 1 |  |   |          |          | 1    |
| 2  | 1 |     |   |   |  | 1 |          |          |      |
| 4  |   |     |   |   |  |   |          |          |      |
| 3  |   |     |   |   |  | 1 |          |          |      |
| 3  |   |     |   |   |  | 1 |          |          |      |
| 1  |   |     | 0 |   |  |   |          | 0.25     |      |
| 12 |   | 1   |   |   |  |   | 1        |          |      |
| 2  |   |     | 1 |   |  |   |          | 1        |      |
| 3  |   |     |   |   |  | 1 |          |          |      |
| 4  |   |     |   | 1 |  |   |          |          | 1    |
| 3  |   |     |   |   |  | 1 |          |          |      |
| 5  |   |     | 1 |   |  |   |          | 0.833333 |      |
| 4  | 1 |     |   |   |  | 1 |          |          |      |
| 0  | 0 |     |   |   |  | 0 |          |          |      |
| 4  |   |     |   | 1 |  |   |          |          | 1    |
| 0  |   |     |   | 0 |  |   |          |          | 0    |
| 5  |   |     | 1 |   |  |   |          | 1        |      |
| 5  |   |     | 1 |   |  |   |          | 1        |      |
| 1  | 0 |     |   |   |  |   | 0.25     |          |      |
| 3  |   |     |   |   |  | 1 |          |          |      |
| 4  |   |     |   |   |  |   |          |          |      |
| 7  |   | 1   |   |   |  |   |          | 1        |      |
| 4  | 1 |     |   |   |  | 1 |          |          |      |
| 3  |   |     |   |   |  | 1 |          |          |      |
| 8  |   | 1   |   |   |  |   |          | 1        |      |
| 0  |   |     |   |   |  | 0 |          |          |      |
| 5  |   | 1   |   |   |  |   | 0.833333 |          |      |
| 6  |   |     | 1 |   |  |   |          |          | 1    |
| 3  |   |     | 1 |   |  |   |          |          | 1    |
| 1  |   | 1   |   |   |  |   |          | 1        |      |
| 2  |   |     |   |   |  |   |          |          |      |
| 4  | 1 |     |   |   |  | 1 |          |          |      |
| 5  |   | 1   |   |   |  |   |          | 1        |      |
| 3  |   |     |   |   |  | 1 |          |          |      |
| 3  |   |     |   |   |  | 1 |          |          |      |
| 4  |   |     |   | 1 |  |   |          |          | 1    |
| 4  |   |     | 1 |   |  |   |          | 1        |      |
| 2  | 1 |     |   |   |  | 1 |          |          |      |
| 4  |   |     |   | 1 |  |   |          |          | 1    |
| 1  |   |     | 0 |   |  |   |          | 0.166667 |      |
| 4  |   |     |   | 1 |  |   |          |          | 1    |
| 6  |   | 1   |   |   |  |   | 0.857143 |          |      |
| 3  |   | 0.5 |   |   |  |   | 0.5      |          |      |
| 1  |   |     |   | 0 |  |   |          |          | 0.25 |
| 4  | 1 |     |   |   |  | 1 |          |          |      |
| 3  |   |     |   |   |  | 1 |          |          |      |
| 3  |   |     |   |   |  | 1 |          |          |      |
| 7  |   |     | 1 |   |  |   |          | 1        |      |
| 3  |   |     |   |   |  | 1 |          |          |      |
| 4  | 1 |     |   |   |  | 1 |          |          |      |

15

|    |   |     |   |     |   |          |          |   |          |
|----|---|-----|---|-----|---|----------|----------|---|----------|
|    | 4 | 1   |   |     |   |          | 1        |   |          |
|    | 2 | 1   |   |     |   | 0.666667 |          |   |          |
|    | 2 |     |   |     |   |          |          |   |          |
| 1S | 4 |     |   |     | 1 |          |          |   | 1        |
|    | 0 | 0   |   |     |   |          | 0        |   |          |
|    | 7 |     |   | 1   |   |          |          | 1 |          |
|    | 3 |     |   |     | 1 |          |          |   |          |
|    | 4 | 1   |   |     |   |          | 1        |   |          |
|    | 2 | 0.5 |   |     |   |          | 0.5      |   |          |
|    | 3 |     |   | 1   |   |          |          |   | 0.6      |
|    | 3 |     |   | 0.5 |   |          |          |   | 0.5      |
|    | 4 | 1   |   |     |   |          | 1        |   |          |
|    | 6 |     |   | 1   |   |          |          |   | 1        |
|    | 8 |     | 1 |     |   |          |          | 1 |          |
|    | 4 |     |   | 1   |   |          |          |   | 0.571429 |
|    | 4 | 1   |   |     |   |          | 1        |   |          |
|    | 4 |     |   |     |   |          |          |   |          |
|    | 3 |     |   |     | 1 |          |          |   |          |
|    | 2 |     |   | 1   |   |          |          |   | 1        |
|    | 3 |     |   |     | 1 |          |          |   |          |
|    | 4 |     |   |     | 1 |          |          |   | 1        |
|    | 3 |     |   |     | 1 |          |          |   |          |
|    | 4 | 1   |   |     |   |          | 1        |   |          |
|    | 1 | 0   |   |     |   |          | 0.25     |   |          |
|    | 3 |     |   |     | 1 |          |          |   |          |
|    | 7 |     | 1 |     |   |          |          | 1 |          |
|    | 5 |     | 1 |     |   |          | 0.833333 |   |          |
|    | 3 |     |   | 1   |   |          |          |   | 1        |
|    | 1 |     | 1 |     |   |          |          | 1 |          |
|    | 4 | 1   |   |     |   |          | 1        |   |          |
|    | 4 |     |   |     | 1 |          |          |   | 1        |
|    | 7 |     |   | 1   |   |          |          |   | 1        |
|    | 3 |     |   |     | 1 |          |          |   |          |
|    | 4 | 1   |   |     |   |          | 1        |   |          |
|    | 6 |     |   | 1   |   |          |          |   | 1        |
|    | 2 | 1   |   |     |   |          | 1        |   |          |
|    | 3 |     |   |     | 1 |          |          |   |          |
|    | 0 | 0   |   |     |   |          | 0        |   |          |
|    | 0 |     |   |     | 0 |          |          |   | 0        |
|    | 5 |     |   | 1   |   |          |          |   | 1        |
|    | 5 |     |   | 1   |   |          |          |   | 1        |
| 1S | 4 |     |   |     |   |          |          |   |          |
|    | 7 |     | 1 |     |   |          |          | 1 |          |
|    | 4 | 1   |   |     |   |          | 1        |   |          |
|    | 1 |     | 1 |     |   |          |          | 1 |          |
|    | 4 |     |   | 1   |   |          |          |   | 1        |
|    | 6 |     | 1 |     |   |          | 0.857143 |   |          |
|    | 3 |     |   |     | 1 |          |          |   |          |
|    | 4 | 1   |   |     |   |          | 1        |   |          |
|    | 3 |     |   | 1   |   |          |          |   | 0.6      |

|   |     |   |     |   |   |          |   |          |      |
|---|-----|---|-----|---|---|----------|---|----------|------|
| 4 |     |   |     | 1 |   |          |   |          | 1    |
| 3 |     |   |     |   | 1 |          |   |          |      |
| 4 | 1   |   |     |   |   | 1        |   |          |      |
| 6 |     |   | 1   |   |   |          |   | 1        |      |
| 4 | 1   |   |     |   |   | 1        |   |          |      |
| 3 |     |   |     | 1 |   |          |   |          | 1    |
| 2 | 1   |   |     |   |   | 1        |   |          |      |
| 4 |     |   |     |   |   |          |   |          |      |
| 3 |     |   |     |   | 1 |          |   |          |      |
| 1 |     |   | 0   |   |   |          |   | 0.25     |      |
| 2 |     |   | 1   |   |   |          |   | 1        |      |
| 3 |     |   |     |   | 1 |          |   |          |      |
| 3 |     |   |     |   | 1 |          |   |          |      |
| 4 | 1   |   |     |   |   | 1        |   |          |      |
| 0 | 0   |   |     |   |   | 0        |   |          |      |
| 4 |     |   |     | 1 |   |          |   |          | 1    |
| 0 |     |   |     | 0 |   |          |   |          | 0    |
| 1 | 0   |   |     |   |   | 0.25     |   |          |      |
| 7 |     | 1 |     |   |   |          | 1 |          |      |
| 4 | 1   |   |     |   |   | 1        |   |          |      |
| 0 |     |   |     |   | 0 |          |   |          |      |
| 3 |     |   | 1   |   |   |          |   | 1        |      |
| 1 |     | 1 |     |   |   |          | 1 |          |      |
| 2 |     |   |     |   |   |          |   |          |      |
| 5 |     | 1 |     |   |   |          | 1 |          |      |
| 3 |     |   |     |   | 1 |          |   |          |      |
| 4 |     |   | 1   |   |   |          |   | 1        |      |
| 4 |     |   |     | 1 |   |          |   |          | 1    |
| 1 |     |   | 0   |   |   |          |   | 0.166667 |      |
| 4 |     |   |     | 1 |   |          |   |          | 1    |
| 6 |     | 1 |     |   |   | 0.857143 |   |          |      |
| 1 |     |   |     | 0 |   |          |   |          | 0.25 |
| 3 |     |   |     |   | 1 |          |   |          |      |
| 4 | 1   |   |     |   |   | 1        |   |          |      |
| 4 | 1   |   |     |   |   | 1        |   |          |      |
| 7 |     |   | 1   |   |   |          |   | 1        |      |
| 2 | 0.5 |   |     |   |   | 0.5      |   |          |      |
| 3 |     |   | 0.5 |   |   |          |   | 0.5      |      |
| 6 |     |   | 1   |   |   |          |   | 1        |      |
| 8 |     | 1 |     |   |   |          | 1 |          |      |
| 4 |     |   | 1   |   |   |          |   | 0.571429 |      |
| 2 |     |   | 1   |   |   |          |   | 1        |      |
| 3 |     |   |     |   | 1 |          |   |          |      |
| 4 |     |   |     | 1 |   |          |   |          | 1    |
| 3 |     |   |     |   | 1 |          |   |          |      |
| 3 |     |   |     |   | 1 |          |   |          |      |
| 4 | 1   |   |     |   |   | 1        |   |          |      |
| 4 | 1   |   |     |   |   | 1        |   |          |      |
| 6 |     |   | 1   |   |   |          |   | 1        |      |
| 2 | 1   |   |     |   |   | 1        |   |          |      |
| 0 | 0   |   |     |   |   | 0        |   |          |      |

15



|    |   |     |     |   |   |      |          |          |
|----|---|-----|-----|---|---|------|----------|----------|
|    | 0 |     |     | 0 |   |      |          | 0        |
|    | 5 |     | 1   |   |   |      | 1        |          |
|    | 3 |     |     |   | 1 |      |          |          |
|    | 1 |     | 0   |   |   |      | 0.25     |          |
|    | 2 |     | 1   |   |   |      | 1        |          |
|    | 5 |     | 1   |   |   |      | 0.833333 |          |
|    | 4 | 1   |     |   |   | 1    |          |          |
|    | 1 | 0   |     |   |   | 0.25 |          |          |
| 1S |   |     |     |   |   |      |          |          |
|    | 3 |     |     |   | 1 |      |          |          |
|    | 3 |     |     |   | 1 |      |          |          |
|    | 4 |     |     | 1 |   |      |          | 1        |
|    | 6 |     | 1   |   |   |      | 0.857143 |          |
|    | 3 |     | 0.5 |   |   |      | 0.5      |          |
|    | 4 | 1   |     |   |   | 1    |          |          |
|    | 7 |     |     | 1 |   |      |          | 1        |
|    | 3 |     |     |   | 1 |      |          |          |
|    | 4 | 1   |     |   |   | 1    |          |          |
|    | 2 |     |     |   |   |      |          |          |
|    | 4 |     |     | 1 |   |      |          | 1        |
|    | 0 | 0   |     |   |   | 0    |          |          |
|    | 7 |     |     | 1 |   |      |          | 1        |
|    | 3 |     | 0.5 |   |   |      |          | 0.5      |
|    | 6 |     | 1   |   |   |      |          | 1        |
|    | 4 | 1   |     |   |   | 1    |          |          |
|    | 4 |     |     |   |   |      |          |          |
|    | 2 |     |     | 1 |   |      |          | 1        |
|    | 7 |     | 1   |   |   |      | 1        |          |
|    | 3 |     |     | 1 |   |      |          | 1        |
|    | 4 | 1   |     |   |   | 1    |          |          |
|    | 4 |     |     | 1 |   |      |          | 1        |
|    | 4 | 1   |     |   |   | 1    |          |          |
|    | 6 |     |     | 1 |   |      |          | 1        |
|    | 3 |     |     |   | 1 |      |          |          |
|    | 1 |     | 1   |   |   |      | 1        |          |
|    | 4 |     |     | 1 |   |      |          | 1        |
|    | 2 | 1   |     |   |   | 1    |          |          |
|    | 3 |     |     |   | 1 |      |          |          |
|    | 2 |     |     | 1 |   |      |          | 1        |
|    | 4 |     |     | 1 |   |      |          | 1        |
|    | 3 |     |     | 1 |   |      |          | 1        |
|    | 2 |     |     |   |   |      |          |          |
|    | 4 |     |     | 1 |   |      |          | 1        |
|    | 4 |     |     | 1 |   |      |          | 1        |
|    | 6 |     | 1   |   |   |      | 0.857143 |          |
|    | 4 | 1   |     |   |   | 1    |          |          |
| 1S |   |     |     |   |   |      |          |          |
|    | 7 |     |     | 1 |   |      |          | 1        |
|    | 2 | 0.5 |     |   |   | 0.5  |          |          |
|    | 4 |     |     | 1 |   |      |          | 0.571429 |
|    | 4 |     |     |   | 1 |      |          |          |
|    | 3 |     |     |   | 1 |      |          | 1        |



|    |   |   |     |   |          |          |     |
|----|---|---|-----|---|----------|----------|-----|
|    | 0 |   |     | 0 |          |          | 0   |
| 1S | 3 |   |     |   | 1        |          |     |
|    | 2 | 1 |     |   | 0.666667 |          |     |
|    | 6 |   | 1   |   |          |          | 1   |
|    | 4 |   |     |   |          |          |     |
|    | 2 |   |     | 1 |          |          | 1   |
|    | 3 |   |     | 1 |          |          | 1   |
|    | 3 |   |     |   | 1        |          |     |
|    | 6 |   |     | 1 |          |          | 1   |
|    | 1 |   | 1   |   |          | 1        |     |
|    | 3 |   |     |   | 1        |          |     |
|    | 4 |   |     | 1 |          |          | 1   |
|    | 4 | 1 |     |   |          | 1        |     |
|    | 2 | 1 |     |   |          | 1        |     |
|    | 0 | 0 |     |   |          | 0        |     |
|    | 4 |   |     | 1 |          |          | 1   |
|    | 1 | 0 |     |   |          | 0.25     |     |
|    | 0 |   |     |   | 0        |          |     |
|    | 4 |   |     | 1 |          |          | 1   |
|    | 3 |   | 0.5 |   |          |          | 0.5 |
|    | 3 |   |     |   | 1        |          |     |
|    | 4 | 1 |     |   |          | 1        |     |
| 1S | 3 |   |     |   | 1        |          |     |
|    | 4 |   |     | 1 |          |          | 1   |
|    | 4 | 1 |     |   |          | 1        |     |
|    | 3 |   | 0.5 |   |          |          | 0.5 |
|    | 6 |   | 1   |   |          |          | 1   |
|    | 4 |   |     |   |          |          |     |
|    | 7 |   | 1   |   |          | 1        |     |
|    | 4 | 1 |     |   |          | 1        |     |
|    | 4 |   |     | 1 |          |          | 1   |
|    | 2 |   |     |   |          | 1        |     |
|    | 2 |   |     |   |          |          |     |
|    | 6 |   | 1   |   |          | 0.857143 |     |
|    | 7 |   |     | 1 |          |          | 1   |
|    | 7 |   |     | 1 |          |          | 1   |
|    | 4 | 1 |     |   |          | 1        |     |
|    | 3 |   |     |   | 1        |          |     |
|    | 4 | 1 |     |   |          | 1        |     |
|    | 7 |   | 1   |   |          | 1        |     |
|    | 4 |   |     | 1 |          |          | 1   |
|    | 7 |   |     |   |          | 1        |     |
|    | 3 |   |     |   | 1        |          |     |
|    | 2 |   |     |   |          |          |     |
|    | 4 | 1 |     |   |          | 1        |     |
|    | 1 | 0 |     |   |          | 0.25     |     |
|    | 4 | 1 |     |   |          | 1        |     |
|    | 4 |   |     |   |          |          |     |
|    | 3 |   |     |   | 1        |          |     |
|    | 3 |   |     |   | 1        |          |     |

|    |   |   |   |   |   |          |   |      |
|----|---|---|---|---|---|----------|---|------|
|    | 4 | 1 |   |   |   | 1        |   |      |
|    | 0 | 0 |   |   |   | 0        |   |      |
|    | 5 |   |   | 1 |   |          |   | 1    |
|    | 1 | 0 |   |   |   | 0.25     |   |      |
| 1S | 3 |   |   |   | 1 |          |   |      |
|    | 7 |   | 1 |   |   |          | 1 |      |
|    | 0 |   |   |   | 0 |          |   |      |
|    | 5 |   | 1 |   |   | 0.833333 |   |      |
|    | 1 |   | 1 |   |   |          | 1 |      |
|    | 4 |   |   | 1 |   |          |   | 1    |
|    | 6 |   | 1 |   |   | 0.857143 |   |      |
|    | 1 |   |   | 0 |   |          |   | 0.25 |
|    | 4 | 1 |   |   |   | 1        |   |      |
| 1S | 2 |   |   |   |   |          |   |      |
|    | 0 | 0 |   |   |   | 0        |   |      |
|    | 7 |   |   | 1 |   |          |   | 1    |
|    | 3 |   |   |   | 1 |          |   |      |
|    | 3 |   | 1 | 1 |   |          |   | 0.6  |
|    | 8 |   | 1 |   |   |          | 1 |      |
|    | 4 |   |   |   |   |          |   |      |
|    | 2 |   |   | 1 |   |          |   | 1    |
|    | 3 |   |   |   | 1 |          |   |      |
|    | 1 | 0 |   |   |   | 0.25     |   |      |
|    | 3 |   |   |   | 1 |          |   |      |
|    | 7 |   | 1 |   |   |          | 1 |      |
|    | 7 |   |   | 1 |   |          |   | 1    |
|    | 3 |   |   |   | 1 |          |   |      |
|    | 6 |   |   | 1 |   |          |   | 1    |
|    | 2 | 1 |   |   |   | 1        |   |      |
|    | 5 |   |   | 1 |   |          |   | 1    |
| 1S | 5 |   |   | 1 |   |          |   | 1    |
|    | 6 |   | 1 |   |   | 0.857143 |   |      |
|    | 4 | 1 |   |   |   | 1        |   |      |
|    | 4 |   |   | 1 |   |          |   | 1    |
|    | 4 | 1 |   |   |   | 1        |   |      |
|    | 3 |   |   | 1 |   |          |   | 1    |
|    | 2 | 1 |   |   |   | 1        |   |      |
|    | 4 |   |   |   |   |          |   |      |
|    | 3 |   |   |   | 1 |          |   |      |
|    | 1 |   |   | 0 |   |          |   | 0.25 |
|    | 3 |   |   |   | 1 |          |   |      |
|    | 3 |   |   |   | 1 |          |   |      |
|    | 0 | 0 |   |   |   | 0        |   |      |
|    | 1 | 0 |   |   |   | 0.25     |   |      |
|    | 4 |   |   | 1 |   |          |   | 1    |
|    | 1 |   |   | 0 |   |          |   | 0.25 |
|    | 3 |   |   |   | 1 |          |   |      |
| 1S | 4 | 1 |   |   |   | 1        |   |      |

|   |   |   |     |   |   |          |          |   |
|---|---|---|-----|---|---|----------|----------|---|
| 3 |   |   | 0.5 |   |   |          | 0.5      |   |
| 6 |   |   | 1   |   |   |          | 1        |   |
| 3 |   |   |     |   | 1 |          |          |   |
| 4 |   |   |     | 1 |   |          |          | 1 |
| 0 |   |   |     | 0 |   |          |          | 0 |
| 5 |   |   | 1   |   |   |          | 1        |   |
| 1 |   |   | 0   |   |   |          | 0.25     |   |
| 2 |   |   | 1   |   |   |          | 1        |   |
| 4 | 1 |   |     |   |   | 1        |          |   |
| 3 |   |   |     |   | 1 |          |          |   |
| 6 |   | 1 |     |   |   | 0.857143 |          |   |
| 2 |   |   |     |   |   |          |          |   |
| 3 |   |   | 0.5 |   |   |          | 0.5      |   |
| 6 |   |   | 1   |   |   |          | 1        |   |
| 3 |   |   | 1   |   |   |          | 1        |   |
| 4 |   |   |     | 1 |   |          |          | 1 |
| 3 |   |   |     |   | 1 |          |          |   |
| 4 |   |   |     | 1 |   |          |          | 1 |
| 2 | 1 |   |     |   |   | 1        |          |   |
| 2 |   |   | 1   |   |   |          | 1        |   |
| 4 |   |   |     | 1 |   |          |          | 1 |
| 4 |   |   | 1   |   |   |          | 0.571429 |   |
| 3 |   |   |     |   | 1 |          |          |   |
| 4 |   |   | 1   |   |   |          | 1        |   |
| 7 |   |   | 1   |   |   |          | 1        |   |
| 4 |   |   |     | 1 |   |          |          | 1 |
| 2 |   |   |     |   |   |          |          |   |
| 2 | 1 |   |     |   |   | 1        |          |   |
| 1 | 0 |   |     |   |   | 0.25     |          |   |
| 2 |   |   |     |   |   |          |          |   |
| 3 |   |   | 0.5 |   |   |          | 0.5      |   |
| 4 |   |   | 1   |   |   |          | 1        |   |
| 3 |   |   |     |   | 1 |          |          |   |
| 4 |   |   |     | 1 |   |          |          | 1 |
| 0 |   |   |     | 0 |   |          |          | 0 |
| 3 |   |   | 1   |   |   |          | 1        |   |
| 2 | 1 |   |     |   |   | 1        |          |   |
| 0 | 0 |   |     |   |   | 0        |          |   |
| 4 |   |   |     | 1 |   |          |          | 1 |
| 3 |   |   |     |   | 1 |          |          |   |
| 4 |   |   |     | 1 |   |          |          | 1 |
| 4 |   |   |     | 1 |   |          |          | 1 |
| 2 |   |   | 1   |   |   |          | 1        |   |
| 7 |   |   | 1   |   |   |          | 1        |   |
| 4 | 1 |   |     |   |   | 1        |          |   |
| 4 |   |   |     | 1 |   |          |          | 1 |
| 3 |   |   |     |   | 1 |          |          |   |
| 4 | 1 |   |     |   |   | 1        |          |   |
| 4 | 1 |   |     |   |   | 1        |          |   |
| 6 |   |   | 1   |   |   |          | 1        |   |
| 3 |   |   | 1   |   |   |          | 1        |   |
| 4 | 1 |   |     |   |   | 1        |          |   |



|   |   |     |     |     |        |
|---|---|-----|-----|-----|--------|
|   | 0 | yes | yes | CS  | male   |
|   | 0 | no  | yes | SVD | female |
|   | 0 | no  | yes | CS  | female |
|   | 0 | no  | yes | SVD | female |
| 1 | 0 | yes | yes | SVD | male   |
| 1 | 0 | no  | yes | SVD | male   |
|   | 1 | yes | no  | ISt | male   |
|   | 0 | no  | no  | ISt | female |
|   | 0 | yes | yes | SVD | female |
| 1 | 0 | no  | yes | SVD | male   |
|   | 0 | no  | yes | SVD | male   |
| 1 | 0 | yes | yes | SVD | female |
|   | 0 | no  | no  | ISt | male   |
|   | 0 | no  | yes | CS  | female |
|   | 1 | yes | no  | ISt | female |
|   | 0 | no  | no  | ISt | female |
|   | 1 | yes | no  | ISt | female |
|   | 0 | no  | yes | SVD | male   |
|   | 0 | no  | yes | ISt | male   |
|   | 1 | yes | yes | SVD | male   |
| 1 | 0 | yes | yes | SVD | female |
|   | 0 | yes | no  | CS  | female |
|   | 0 | yes | yes | ISt | male   |
|   | 0 | yes | yes | SVD | female |
|   | 0 | yes | yes | SVD | female |
| 1 | 0 | yes | yes | SVD | female |
|   | 0 | yes | yes | SVD | male   |
| 0 | 1 | yes | yes | SVD | male   |
|   | 0 | yes | no  | CS  | male   |
|   | 0 | yes | no  | SVD | male   |
|   | 0 | yes | yes | SVD | female |
|   | 0 | yes | yes | SVD | female |
|   | 0 | no  | no  | SVD | female |
|   | 0 | yes | yes | CS  | male   |
|   | 0 | no  | yes | SVD | male   |
| 1 | 0 | yes | yes | CS  | male   |
| 1 | 0 | no  | yes | SVD | female |
|   | 0 | no  | no  | ISt | female |
|   | 0 | no  | yes | SVD | male   |
|   | 0 | yes | yes | SVD | female |
|   | 0 | no  | yes | SVD | female |
|   | 1 | yes | no  | CS  | female |
|   | 0 | yes | no  | ISt | female |
|   | 0 | no  | no  | SVD | female |
|   | 1 | yes | yes | SVD | male   |
|   | 0 | yes | yes | ISt | female |
|   | 0 | yes | yes | CS  | male   |
| 1 | 0 | yes | no  | CS  | male   |
| 1 | 0 | no  | yes | SVD | male   |
|   | 0 | yes | yes | SVD | male   |
| 1 | 0 | yes | no  | SVD | female |
|   | 0 | no  | no  | SVD | male   |

|   |   |     |     |     |        |
|---|---|-----|-----|-----|--------|
|   | 0 | yes | yes | SVD | female |
|   | 1 | yes | yes | ISt | male   |
|   | 0 | yes | yes | ISt | male   |
|   | 0 | yes | no  | CS  | female |
|   | 0 | no  | no  | SVD | male   |
|   | 1 | no  | yes | SVD | female |
|   | 0 | no  | yes | CS  | female |
| 1 | 0 | yes | no  | SVD | female |
|   | 0 | no  | yes | SVD | male   |
|   | 1 | yes | yes | CS  | male   |
|   | 0 | yes | yes | SVD | female |
|   | 0 | no  | yes | SVD | female |
|   | 0 | no  | no  | SVD | male   |
|   | 1 | no  | yes | SVD | female |
|   | 0 | no  | yes | SVD | male   |
|   | 0 | no  | no  | CS  | female |
|   | 0 | yes | yes | CS  | male   |
|   | 0 | no  | yes | SVD | female |
| 1 | 0 | yes | yes | SVD | male   |
|   | 1 | yes | yes | SVD | female |
| 1 | 0 | no  | yes | SVD | male   |
|   | 0 | no  | yes | SVD | male   |
| 1 | 0 | yes | yes | SVD | female |
|   | 0 | no  | yes | CS  | female |
|   | 1 | yes | yes | SVD | male   |
|   | 0 | yes | yes | SVD | female |
|   | 0 | yes | no  | CS  | male   |
|   | 0 | yes | yes | SVD | female |
|   | 0 | yes | yes | SVD | female |
|   | 0 | yes | yes | CS  | male   |
|   | 0 | yes | no  | ISt | female |
|   | 0 | yes | yes | SVD | male   |
| 1 | 0 | yes | no  | SVD | female |
|   | 0 | no  | no  | SVD | male   |
|   | 0 | no  | yes | SVD | female |
|   | 0 | no  | yes | CS  | female |
| 1 | 0 | yes | yes | SVD | male   |
|   | 1 | yes | no  | ISt | female |
|   | 1 | yes | no  | ISt | female |
|   | 0 | no  | yes | SVD | male   |
|   | 0 | no  | yes | ISt | male   |
|   | 0 | yes | no  | CS  | female |
|   | 0 | yes | yes | ISt | male   |
|   | 0 | yes | yes | SVD | female |
|   | 0 | yes | yes | SVD | female |
|   | 0 | yes | yes | SVD | female |
|   | 0 | yes | no  | ISt | female |
|   | 0 | no  | no  | SVD | female |
| 1 | 0 | yes | no  | SVD | female |
|   | 0 | yes | yes | SVD | female |
|   | 0 | yes | yes | SVD | female |



|   |       |     |     |        |
|---|-------|-----|-----|--------|
|   | 0 no  | yes | SVD | male   |
| 1 | 0 yes | yes | SVD | female |
|   | 1 no  | no  | SVD | male   |
|   | 0 no  | yes | SVD | female |
|   | 0 yes | yes | CS  | male   |
|   | 0 no  | yes | SVD | female |
|   | 0 no  | yes | CS  | female |
|   | 0 no  | yes | SVD | female |
| 1 | 0 yes | yes | SVD | male   |
|   | 1 yes | no  | ISt | male   |
|   | 0 yes | yes | SVD | female |
| 1 | 0 no  | yes | SVD | male   |
| 1 | 0 yes | yes | SVD | female |
|   | 0 no  | yes | CS  | female |
|   | 1 yes | no  | ISt | female |
|   | 0 no  | no  | ISt | female |
|   | 1 yes | no  | ISt | female |
|   | 1 yes | yes | SVD | male   |
|   | 0 yes | yes | SVD | female |
|   | 0 yes | yes | SVD | female |
| 0 | 1 yes | yes | SVD | male   |
|   | 0 yes | yes | SVD | female |
|   | 0 yes | yes | SVD | female |
|   | 0 no  | no  | SVD | female |
|   | 0 no  | yes | SVD | male   |
| 1 | 0 no  | yes | SVD | female |
|   | 0 no  | yes | SVD | male   |
|   | 0 no  | yes | SVD | female |
|   | 1 yes | no  | CS  | female |
|   | 0 yes | no  | ISt | female |
|   | 0 no  | no  | SVD | female |
|   | 0 yes | yes | ISt | female |
| 1 | 0 yes | no  | CS  | male   |
|   | 0 no  | no  | SVD | male   |
|   | 0 yes | yes | SVD | female |
|   | 0 yes | no  | CS  | female |
|   | 0 no  | yes | CS  | female |
|   | 1 yes | yes | CS  | male   |
|   | 0 no  | yes | SVD | female |
|   | 0 no  | yes | SVD | female |
|   | 0 no  | yes | SVD | male   |
|   | 0 no  | no  | CS  | female |
|   | 0 yes | yes | SVD | female |
| 1 | 0 no  | yes | SVD | male   |
|   | 0 no  | yes | SVD | male   |
| 1 | 0 yes | yes | SVD | female |
| 1 | 0 yes | yes | SVD | female |
|   | 1 yes | yes | CS  | male   |
|   | 0 no  | no  | SVD | male   |
|   | 0 no  | yes | SVD | female |
|   | 0 no  | yes | CS  | female |
|   | 1 yes | no  | ISt | female |

|   |   |     |     |     |        |        |
|---|---|-----|-----|-----|--------|--------|
|   | 1 | yes | no  | ISt | female |        |
|   |   | 0   | no  | yes | SVD    | male   |
| 1 |   | 0   | yes | yes | SVD    | male   |
|   |   | 1   | yes | no  | ISt    | male   |
|   |   | 0   | yes | yes | SVD    | female |
|   |   | 0   | no  | no  | ISt    | male   |
|   |   | 0   | no  | yes | CS     | female |
|   |   | 1   | yes | yes | SVD    | male   |
|   |   | 0   | yes | no  | CS     | female |
| 1 |   | 0   | yes | yes | SVD    | female |
| 1 |   | 0   | yes | yes | CS     | male   |
|   |   | 0   | yes | no  | ISt    | female |
|   |   | 0   | no  | no  | SVD    | female |
|   |   | 1   | yes | yes | SVD    | male   |
|   |   | 0   | yes | yes | CS     | male   |
|   |   | 0   | yes | yes | SVD    | male   |
| 1 |   | 0   | yes | no  | SVD    | female |
|   |   | 0   | yes | yes | SVD    | female |
|   |   | 1   | yes | yes | ISt    | male   |
|   |   | 0   | no  | no  | SVD    | male   |
|   |   | 1   | no  | yes | SVD    | female |
|   |   | 0   | no  | yes | CS     | female |
|   |   | 0   | no  | yes | SVD    | female |
|   |   | 0   | no  | yes | SVD    | female |
|   |   | 0   | yes | yes | CS     | male   |
|   |   | 0   | no  | yes | SVD    | female |
|   |   | 0   | yes | yes | SVD    | female |
|   |   | 0   | yes | yes | SVD    | female |
|   |   | 0   | yes | yes | SVD    | female |
|   |   | 0   | yes | yes | CS     | male   |
|   |   | 0   | yes | no  | ISt    | female |
|   |   | 0   | no  | no  | SVD    | male   |
|   |   | 0   | no  | yes | SVD    | female |
| 1 |   | 0   | yes | yes | SVD    | male   |
|   |   | 0   | yes | yes | SVD    | female |
|   |   | 0   | no  | no  | ISt    | female |
|   |   | 0   | yes | yes | SVD    | female |
|   |   | 0   | no  | no  | SVD    | female |
|   |   | 0   | no  | yes | SVD    | male   |
|   |   | 0   | yes | no  | ISt    | female |
|   |   | 0   | no  | no  | SVD    | female |
|   |   | 0   | no  | no  | SVD    | male   |
|   |   | 0   | yes | no  | CS     | female |
|   |   | 0   | no  | yes | CS     | female |
|   |   | 1   | yes | yes | CS     | male   |
|   |   | 0   | no  | no  | CS     | female |
|   |   | 0   | no  | yes | SVD    | male   |
| 1 |   | 0   | yes | yes | SVD    | female |

|   |   |     |     |     |        |
|---|---|-----|-----|-----|--------|
| 1 | 0 | yes | yes | SVD | male   |
|   | 0 | no  | yes | CS  | female |
|   | 0 | no  | no  | ISt | female |
|   | 0 | yes | yes | SVD | female |
| 0 | 1 | yes | yes | SVD | male   |
|   | 0 | yes | yes | CS  | male   |
|   | 0 | no  | yes | SVD | male   |
| 1 | 0 | yes | no  | CS  | male   |
|   | 0 | yes | yes | SVD | male   |
|   | 0 | no  | no  | SVD | male   |
|   | 0 | yes | no  | CS  | female |
|   | 0 | no  | no  | SVD | male   |
| 1 | 0 | yes | yes | SVD | male   |
| 1 | 0 | no  | yes | SVD | male   |
|   | 0 | no  | yes | SVD | male   |
| 1 | 0 | yes | yes | SVD | female |
|   | 0 | no  | yes | CS  | female |
|   | 0 | yes | yes | SVD | female |
|   | 0 | yes | no  | ISt | female |
|   | 0 | yes | yes | SVD | male   |
| 1 | 0 | yes | no  | SVD | female |
|   | 0 | no  | yes | SVD | male   |
|   | 0 | yes | yes | SVD | female |
|   | 0 | no  | no  | SVD | female |
|   | 0 | no  | yes | SVD | male   |
|   | 0 | no  | no  | SVD | male   |
|   | 0 | no  | yes | SVD | female |
|   | 0 | no  | no  | ISt | female |
|   | 0 | yes | yes | SVD | female |
|   | 0 | no  | no  | SVD | female |
| 1 | 0 | no  | yes | SVD | female |
|   | 1 | no  | yes | SVD | female |
|   | 0 | yes | no  | ISt | female |
|   | 0 | no  | no  | SVD | female |
| 1 | 0 | yes | no  | CS  | male   |
|   | 0 | no  | yes | SVD | female |
|   | 0 | no  | yes | CS  | female |
|   | 1 | yes | no  | ISt | female |
|   | 0 | yes | yes | SVD | female |
|   | 0 | no  | no  | ISt | male   |
|   | 0 | no  | yes | CS  | female |
|   | 1 | yes | yes | SVD | male   |
| 1 | 0 | yes | yes | SVD | female |
|   | 0 | yes | no  | ISt | female |
|   | 0 | yes | yes | ISt | male   |
|   | 0 | no  | no  | SVD | male   |
|   | 1 | no  | yes | SVD | female |
|   | 0 | no  | yes | SVD | female |
| 1 | 0 | yes | yes | SVD | male   |
|   | 0 | no  | yes | SVD | male   |
| 1 | 0 | no  | yes | SVD | male   |
|   | 0 | no  | no  | ISt | female |

|   |   |     |     |     |        |
|---|---|-----|-----|-----|--------|
|   | 1 | yes | no  | ISt | female |
|   | 1 | yes | no  | CS  | female |
| 1 | 0 | yes | yes | CS  | male   |
|   | 1 | yes | yes | ISt | male   |
|   | 0 | no  | yes | SVD | female |
|   | 0 | no  | yes | SVD | female |
|   | 0 | yes | yes | SVD | female |
|   | 0 | yes | yes | SVD | female |
| 1 | 0 | yes | no  | SVD | female |
|   | 1 | no  | yes | SVD | female |
|   | 0 | yes | yes | SVD | female |
| 1 | 0 | yes | no  | SVD | female |
|   | 0 | no  | yes | SVD | male   |
|   | 0 | no  | no  | SVD | male   |
|   | 0 | no  | yes | CS  | female |
|   | 1 | yes | no  | ISt | female |
|   | 0 | no  | no  | ISt | female |
| 0 | 1 | yes | yes | SVD | male   |
|   | 1 | yes | yes | SVD | male   |
|   | 0 | yes | no  | ISt | female |
|   | 0 | no  | yes | SVD | female |
| 1 | 0 | yes | yes | SVD | female |
|   | 0 | no  | yes | CS  | female |
|   | 0 | yes | no  | CS  | female |
| 1 | 0 | yes | yes | CS  | male   |
|   | 0 | yes | no  | ISt | female |
|   | 0 | yes | yes | SVD | female |
|   | 0 | no  | yes | SVD | female |
|   | 0 | no  | yes | SVD | female |
|   | 0 | no  | yes | SVD | female |
|   | 0 | yes | yes | SVD | female |
|   | 0 | yes | yes | CS  | male   |
|   | 0 | yes | no  | ISt | female |
|   | 0 | yes | yes | SVD | female |
|   | 0 | no  | no  | SVD | female |
|   | 1 | no  | no  | SVD | female |
|   | 0 | no  | yes | CS  | female |
|   | 0 | yes | yes | SVD | male   |
|   | 0 | no  | no  | SVD | male   |
| 1 | 0 | yes | yes | SVD | male   |
|   | 0 | no  | yes | CS  | female |
|   | 0 | yes | yes | SVD | female |
|   | 0 | yes | no  | ISt | female |
|   | 0 | yes | yes | SVD | male   |
| 1 | 0 | yes | no  | SVD | female |
|   | 0 | no  | no  | SVD | female |
|   | 0 | no  | yes | CS  | female |
|   | 1 | yes | yes | SVD | male   |
|   | 0 | yes | yes | CS  | male   |
|   | 0 | no  | yes | SVD | female |
| 1 | 0 | yes | yes | SVD | male   |
| 1 | 0 | yes | yes | SVD | female |

|   |       |     |     |        |
|---|-------|-----|-----|--------|
|   | 0 no  | yes | CS  | female |
|   | 1 yes | no  | ISt | female |
|   | 0 no  | yes | SVD | male   |
|   | 1 yes | yes | SVD | male   |
| 1 | 0 yes | yes | SVD | female |
|   | 0 yes | no  | CS  | female |
|   | 0 yes | yes | SVD | female |
| 0 | 1 yes | yes | SVD | male   |
|   | 0 yes | no  | CS  | male   |
|   | 0 yes | yes | SVD | female |
|   | 0 no  | yes | SVD | female |
|   | 0 no  | no  | SVD | female |
|   | 0 yes | yes | ISt | female |
|   | 0 yes | yes | CS  | male   |
|   | 0 yes | yes | ISt | male   |
|   | 0 yes | no  | CS  | female |
|   | 1 no  | yes | SVD | female |
|   | 1 no  | yes | CS  | female |
| 1 | 0 yes | no  | SVD | female |
|   | 0 yes | yes | SVD | female |
|   | 0 no  | yes | SVD | male   |
|   | 0 no  | yes | SVD | female |
|   | 0 yes | yes | SVD | female |
| 1 | 0 no  | yes | SVD | male   |
|   | 1 yes | yes | SVD | male   |
| 1 | 0 yes | yes | SVD | female |
|   | 0 yes | yes | SVD | female |
|   | 0 yes | yes | SVD | male   |
| 1 | 0 yes | no  | SVD | female |
|   | 0 no  | yes | SVD | female |
|   | 0 no  | yes | CS  | female |
|   | 0 no  | yes | SVD | male   |
|   | 0 no  | yes | ISt | male   |
|   | 0 yes | no  | CS  | female |
|   | 0 no  | no  | SVD | female |
|   | 0 yes | yes | SVD | female |
|   | 0 no  | yes | SVD | male   |
|   | 0 no  | no  | SVD | male   |
|   | 1 no  | yes | SVD | female |
|   | 0 no  | yes | CS  | female |
|   | 0 no  | yes | SVD | female |
| 1 | 0 yes | yes | SVD | male   |
|   | 1 yes | no  | ISt | male   |
| 1 | 0 no  | yes | SVD | male   |
| 1 | 0 yes | yes | SVD | female |
|   | 1 yes | no  | ISt | female |
|   | 1 yes | yes | SVD | male   |
|   | 0 no  | yes | SVD | female |
|   | 0 yes | yes | ISt | female |
| 1 | 1 yes | no  | CS  | male   |
|   | 0 yes | yes | SVD | female |
|   | 0 yes | no  | CS  | female |

|   |   |     |     |     |        |
|---|---|-----|-----|-----|--------|
|   | 0 | no  | yes | SVD | female |
|   | 0 | no  | yes | SVD | female |
| 1 | 0 | no  | yes | SVD | male   |
|   | 0 | no  | yes | SVD | male   |
|   | 1 | yes | no  | ISt | female |
|   | 0 | no  | yes | SVD | male   |
|   | 1 | yes | no  | ISt | male   |
|   | 1 | yes | yes | SVD | female |
| 1 | 0 | no  | yes | CS  | female |
|   | 0 | yes | yes | CS  | male   |
|   | 0 | no  | no  | SVD | female |
|   | 0 | yes | yes | ISt | male   |
|   | 0 | no  | yes | SVD | female |
|   | 0 | no  | yes | SVD | female |
|   | 0 | yes | yes | SVD | female |
| 1 | 1 | yes | no  | ISt | female |
|   | 0 | yes | yes | SVD | male   |
|   | 0 | no  | yes | SVD | male   |
|   | 0 | no  | yes | CS  | female |
|   | 0 | yes | yes | SVD | female |
|   | 0 | yes | no  | ISt | female |
| 1 | 0 | no  | no  | CS  | female |
|   | 0 | yes | yes | SVD | male   |
|   | 1 | no  | yes | SVD | male   |
|   | 0 | yes | yes | SVD | male   |
|   | 0 | no  | yes | SVD | male   |
|   | 0 | no  | no  | SVD | female |
|   | 0 | no  | yes | CS  | female |
|   | 1 | yes | yes | SVD | male   |
|   | 0 | yes | yes | ISt | male   |
|   | 0 | no  | yes | SVD | female |
|   | 0 | no  | yes | SVD | male   |
| 1 | 0 | no  | yes | SVD | male   |
|   | 0 | no  | no  | ISt | female |
|   | 1 | yes | no  | ISt | female |
|   | 0 | yes | yes | SVD | female |
|   | 0 | no  | yes | CS  | female |
|   | 1 | yes | no  | ISt | female |
|   | 0 | yes | no  | ISt | female |
| 1 | 1 | yes | yes | CS  | male   |
|   | 0 | yes | no  | ISt | female |
|   | 0 | yes | no  | ISt | female |
|   | 0 | yes | yes | SVD | female |
|   | 0 | no  | yes | CS  | female |
|   | 0 | no  | no  | SVD | male   |
|   | 0 | yes | no  | ISt | female |
| 1 | 0 | yes | no  | SVD | female |
|   | 0 | no  | yes | CS  | female |
|   | 0 | yes | yes | CS  | male   |
|   | 0 | no  | yes | SVD | female |
|   | 0 | yes | yes | SVD | female |
|   | 1 | yes | yes | CS  | male   |

0 no      yes      SVD      female
